# Supplementary material
Source: Royal Society of Chemistry journal article supplement (doi:10.1039/d5ay01603g)
Supplement: d5ay01603g1.pdf [file d5ay01603g1.pdf]

1 **Advanced GC Method for Comprehensive Residual Solvent Analysis:**  
2 **Overcoming Co-elution with Orthogonal Columns and Quantification**  
3 **by Mass Spectrometry**

4

Ruba Arulraj<sup>1</sup>, Vinay Vishwanath<sup>1\*</sup>, Sharad Duche<sup>1\*</sup>, Arvind Mathur<sup>2</sup>, Amrita Roy<sup>1</sup>

<sup>1</sup>Discovery Analytical Sciences, Biocon Bristol Myers Squibb Research & Development Center (BBRC),  
Bangalore, India.

<sup>2</sup>Discovery & Development Sciences, Bristol Myers Squibb, P.O. Box 5400, Princeton, New Jersey 08543-  
4000, United States.

5

6 **CRedit author statement**

7 Ruba Arulraj: data collection, visualisation, investigation, and writing experiments; Vinay Vishwanath: data  
8 investigation, validation, and manuscript drafting; Sharad Duche: conceptualisation, methodology, validation,  
9 supervision, reviewing, and editing; Amrita Roy: supervision, draft reviewing, and editing; Arvind Mathur:  
10 reviewing, and funding acquisition.

11

12 \*Corresponding authors:

13 **Sharad Duche**- Discovery Analytical Sciences, Biocon Bristol-Myers Squibb R&D Center, Syngene  
14 International Ltd, Biocon Park, Plot No. 2 & 3, Bommasandra IV Phase, Jigani Link Road, Bangalore 560099,  
15 India.

16 Email: [sharad.duche@syngeneintl.com](mailto:sharad.duche@syngeneintl.com)

17

18 **Vinay Vishwanath** - Discovery Analytical Sciences, Biocon Bristol-Myers Squibb R&D Center, Syngene  
19 International Ltd, Biocon Park, Plot No. 2 & 3, Bommasandra IV Phase, Jigani Link Road, Bangalore 560099,  
20 India.

21 Email: [Vinay.Vishwanath1@syngeneintl.com](mailto:Vinay.Vishwanath1@syngeneintl.com)

1 **Table S1: Summary of 40 solvents used for method development with Agilent GC-FID.**

| Sr. No | Solvent name            | CAS No.    | ICH class | Permissible Limit (ppm) | Concentration used in study (ppm) |
|--------|-------------------------|------------|-----------|-------------------------|-----------------------------------|
| 1      | Methanol                | 67-56-1    | Class 2   | 3000                    | 3150                              |
| 2      | Acetonitrile            | 75-05-8    | Class 2   | 410                     | 455                               |
| 3      | Dichloromethane         | 75-09-2    | Class 2   | 600                     | 590                               |
| 4      | t-Butanol               | 75-65-0    | Class 2   | 3500                    | 3845                              |
| 5      | Hexane                  | 110-54-3   | Class 2   | 290                     | 305                               |
| 6      | Tetrahydrofuran         | 109-99-9   | Class 2   | 720                     | 815                               |
| 7      | Cyclohexane             | 110-82-7   | Class 2   | 3880                    | 3945                              |
| 8      | 1,4-Dioxane             | 123-91-1   | Class 2   | 380                     | 415                               |
| 9      | Toluene                 | 108-88-3   | Class 2   | 890                     | 915                               |
| 10     | 2-Hexanone              | 591-78-6   | Class 2   | 50                      | 49                                |
| 11     | Ethylene glycol         | 107-21-1   | Class 2   | 620                     | 635                               |
| 12     | Dimethylformamide       | 68-12-2    | Class 2   | 880                     | 910                               |
| 13     | p-Xylene                | 106-42-3   | Class 2   | 2170                    | 2280                              |
| 14     | Dimethylacetamide       | 127-19-5   | Class 2   | 1090                    | 1200                              |
| 15     | Ethanol                 | 64-17-5    | Class 3   | 5000                    | 5142                              |
| 16     | Pentane                 | 109-66-0   | Class 3   | 5000                    | 5125                              |
| 17     | Diethyl ether           | 60-29-7    | Class 3   | 5000                    | 5314                              |
| 18     | Acetone                 | 67-64-1    | Class 3   | 5000                    | 4978                              |
| 19     | Isopropyl alcohol       | 67-63-0    | Class 3   | 5000                    | 5155                              |
| 20     | Methyl acetate          | 79-20-9    | Class 3   | 5000                    | 4995                              |
| 21     | t-Butyl methyl ether    | 1634-04-4  | Class 3   | 5000                    | 4955                              |
| 22     | 1-Propanol              | 71-23-8    | Class 3   | 5000                    | 5245                              |
| 23     | Methylethylketone       | 78-93-3    | Class 3   | 5000                    | 5225                              |
| 24     | Ethyl acetate           | 141-78-6   | Class 3   | 5000                    | 5145                              |
| 25     | 2-Methyl-1-propanol     | 78-83-1    | Class 3   | 5000                    | 4785                              |
| 26     | Isopropyl acetate       | 108-21-4   | Class 3   | 5000                    | 5120                              |
| 27     | 2-Methyltetrahydrofuran | 96-47-9    | Class 3   | 5000                    | 5450                              |
| 28     | Heptane                 | 142-82-5   | Class 3   | 5000                    | 4750                              |
| 29     | 1-Butanol               | 71-36-3    | Class 3   | 5000                    | 5120                              |
| 30     | 3-Methyl-1-butanol      | 123-51-3   | Class 3   | 5000                    | 5145                              |
| 31     | 1-Pentanol              | 71-41-0    | Class 3   | 5000                    | 5124                              |
| 32     | Butyl acetate*          | 123-86-4   | Class 3   | 5000                    | 5125                              |
| 33     | Dimethyl sulfoxide      | 67-68-5    | Class 3   | 5000                    | 4785                              |
| 34     | Iso-propyl ether        | 108-20-3   | NA        | 1000*                   | 1154                              |
| 35     | Methyl cyclopentane     | 96-37-7    | NA        | 1000*                   | 1045                              |
| 36     | t-Butyl acetate         | 540-88-5   | NA        | 1000*                   | 1060                              |
| 37     | 2-Ethoxy propanol       | 19089-47-5 | NA        | 1000*                   | 1054                              |
| 38     | Cyclopentanone          | 120-92-3   | NA        | 1000*                   | 975                               |
| 39     | Ethylbenzene            | 100-41-4   | NA        | 1000*                   | 1005                              |
| 40     | o-Xylene                | 95-47-6    | NA        | 1000*                   | 1010                              |

2

3 NA - adequate toxicological data is not available as per ICH guidelines, and a limit of 1000\* ppm was used for the method development  
4 and validation study.

5

1 **Table S2: Summary of 57 solvents used for method development with Agilent GC-FID and Thermo GC-FID-MS.**

| Sr. No | Solvent                  | CAS no    | ICH class | Permissible limit (ppm) | Concentration used in study (ppm) | Solvent polarity |
|--------|--------------------------|-----------|-----------|-------------------------|-----------------------------------|------------------|
| 1      | Benzene                  | 71-43-2   | Class 1   | 2                       | 2.1                               | HNP              |
| 2      | Formamide                | 75-12-7   | Class 1   | 220                     | 245.3                             | HP               |
| 3      | Methanol                 | 67-56-1   | Class 2   | 3000                    | 3480                              | MP               |
| 4      | 1,2-Dichloroethene       | 156-59-2  | Class 2   | 1870                    | 1790                              | MP               |
| 5      | Acetonitrile             | 75-05-8   | Class 2   | 410                     | 390                               | MP               |
| 6      | Dichloromethane          | 75-09-2   | Class 2   | 600                     | 686                               | MP               |
| 7      | Hexane                   | 110-54-3  | Class 2   | 290                     | 263                               | HNP              |
| 8      | Nitromethane             | 75-52-5   | Class 2   | 50                      | 59.3                              | MNP              |
| 9      | Tetrahydrofuran          | 109-99-9  | Class 2   | 720                     | 733                               | MP               |
| 10     | Trichloromethane         | 67-66-3   | Class 2   | 60                      | 58                                | MP               |
| 11     | Cyclohexane              | 110-82-7  | Class 2   | 3880                    | 3993                              | HNP              |
| 12     | 2-Methoxyethanol         | 109-86-4  | Class 2   | 50                      | 56.6                              | PO               |
| 13     | 1,2-Dimethoxyethane      | 110-71-4  | Class 2   | 100                     | 123                               | MP               |
| 14     | 1,1,2-Trichloroethene    | 79-00-5   | Class 2   | 80                      | 76                                | MNP              |
| 15     | 1,4-Dioxane              | 123-91-1  | Class 2   | 380                     | 399                               | MP               |
| 16     | Methyl isobutyl ketone   | 108-10-1  | Class 2   | 4500                    | 3602                              | MP               |
| 17     | Pyridine                 | 110-86-1  | Class 2   | 200                     | 162.6                             | PO               |
| 18     | Toluene                  | 108-88-3  | Class 2   | 890                     | 954                               | HNP              |
| 19     | 2-Hexanone               | 591-78-6  | Class 2   | 50                      | 62                                | MP               |
| 20     | Ethylene glycol          | 107-21-1  | Class 2   | 620                     | 621                               | PO               |
| 21     | Dimethylformamide        | 68-12-2   | Class 2   | 880                     | 1023                              | HP               |
| 22     | Chlorobenzene            | 108-90-7  | Class 2   | 360                     | 356.6                             | MNP              |
| 23     | p-Xylene                 | 106-42-3  | Class 2   | 2170                    | 2080                              | HNP              |
| 24     | Dimethylacetamide        | 127-19-5  | Class 2   | 1090                    | 1048                              | HP               |
| 25     | Cumene                   | 98-82-8   | Class 2   | 70                      | 86.6                              | HNP              |
| 26     | Ethanol                  | 64-17-5   | Class 3   | 5000                    | 5452                              | MP               |
| 27     | Pentane                  | 109-66-0  | Class 3   | 5000                    | 4962                              | HNP              |
| 28     | Diethyl ether            | 60-29-7   | Class 3   | 5000                    | 5274                              | MP               |
| 29     | Acetone                  | 67-64-1   | Class 3   | 5000                    | 5364                              | MP               |
| 30     | Isopropyl alcohol        | 67-63-0   | Class 3   | 5000                    | 5070                              | MP               |
| 31     | Ethyl formate            | 109-94-4  | Class 3   | 5000                    | 5398                              | MP               |
| 32     | Methyl acetate           | 79-20-9   | Class 3   | 5000                    | 5313                              | MP               |
| 33     | t-Butanol                | 75-65-0   | Class 3   | 3500                    | 3345                              | PO               |
| 34     | Methyl tert-butyl ether  | 1634-04-4 | Class 3   | 5000                    | 4835                              | MP               |
| 35     | 1-Propanol               | 71-23-8   | Class 3   | 5000                    | 5512                              | MP               |
| 36     | Methyl ethyl ketone      | 78-93-3   | Class 3   | 5000                    | 4860                              | PO               |
| 37     | Ethyl acetate            | 141-78-6  | Class 3   | 5000                    | 4866                              | MP               |
| 38     | 2-Butanol                | 78-92-2   | Class 3   | 5000                    | 5269                              | HP               |
| 39     | 2-Methyl-1-propanol      | 78-83-1   | Class 3   | 5000                    | 4963                              | MNP              |
| 40     | Isopropyl acetate        | 108-21-4  | Class 3   | 5000                    | 5460                              | MP               |
| 41     | 2-methyl-tetrahydrofuran | 96-47-9   | Class 3   | 5000                    | 5016                              | MP               |
| 42     | Triethylamine            | 121-44-8  | Class 3   | 5000                    | 4661                              | NP               |
| 43     | Heptane                  | 142-82-5  | Class 3   | 5000                    | 5531                              | HNP              |
| 44     | 1-Butanol                | 71-36-3   | Class 3   | 5000                    | 5002                              | MP               |
| 45     | Methylcyclohexane        | 108-87-2  | Class 3   | 1180                    | 1091                              | NP               |
| 46     | n-Propylacetate          | 109-60-4  | Class 3   | 5000                    | 5556                              | MP               |
| 47     | 2-Ethoxyethanol          | 110-80-5  | Class 3   | 160                     | 199                               | PO               |
| 48     | Cyclopentyl methyl ether | 5614-37-9 | Class 3   | 1500                    | 1527                              | MP               |
| 49     | 3-Methyl-1-butanol       | 123-51-3  | Class 3   | 5000                    | 4742                              | PO               |
| 50     | Isobutyl acetate         | 110-19-0  | Class 3   | 5000                    | 5266                              | MP               |
| 51     | 1-Pentanol               | 71-41-0   | Class 3   | 5000                    | 4926                              | MP               |
| 52     | n-Butyl acetate          | 123-86-4  | Class 3   | 5000                    | 4820                              | MP               |
| 53     | Dimethyl Sulfoxide       | 67-68-5   | Class 3   | 5000                    | 5022                              | HP               |
| 54     | Anisole                  | 100-66-3  | Class 3   | 5000                    | 4944                              | MP               |
| 55     | Isopropyl ether          | 108-20-3  | NA        | 1000*                   | 933                               | NP               |
| 56     | 2,2-Dimethoxypropane     | 77-76-9   | NA        | 1000*                   | 1186                              | MP               |
| 57     | Isooctane                | 540-84-1  | NA        | 1000*                   | 1401                              | HNP              |

2  
3 HNP- highly nonpolar, MNP - moderate nonpolar, P - nonpolar, PO - polar, MP - moderately polar, HP – highly polar.

4 NA - adequate toxicological data is not available as per ICH guidelines, and a limit of 1000\* ppm was used for the method development  
5 and validation study.

6  
7

1 Table S3a: Details of several trials performed to optimize the GC conditions for the separation of 40 solvents.

| Trials                             | GC column flow rate optimization (ml/min) |            |                                    |                                   |            |                                    |                                   |            |                                    |                                   |            |                 |
|------------------------------------|-------------------------------------------|------------|------------------------------------|-----------------------------------|------------|------------------------------------|-----------------------------------|------------|------------------------------------|-----------------------------------|------------|-----------------|
|                                    | Trial-1<br>(Figure-S1 to S4)              |            |                                    | Trial-2<br>(Figure-S5)            |            |                                    | Trial-3<br>(Figure-S6)            |            |                                    | Trial-4<br>(Figure-S7)            |            |                 |
| <b>Instrument</b>                  | Agilent 7890B GC system                   |            |                                    | Agilent 7890B GC system           |            |                                    | Agilent 7890B GC system           |            |                                    | Agilent 7890B GC system           |            |                 |
| <b>Column</b>                      | VF-624 to HP-5 dual columns setup         |            |                                    | VF-624 to HP-5 dual columns setup |            |                                    | VF-624 to HP-5 dual columns setup |            |                                    | VF-624 to HP-5 dual columns setup |            |                 |
| <b>Carrier Gas</b>                 | Helium                                    |            |                                    | Helium                            |            |                                    | Helium                            |            |                                    | Helium                            |            |                 |
| <b>Column flow</b>                 | 2.3 ml at constant flow of Helium         |            |                                    | 3.5 ml at constant flow of Helium |            |                                    | 4.0 ml at constant flow of Helium |            |                                    | 5.0 ml at constant flow of Helium |            |                 |
| <b>Injection Volume</b>            | 1 µl                                      |            |                                    | 1 µl                              |            |                                    | 1 µl                              |            |                                    | 1 µl                              |            |                 |
| <b>Injection Mode</b>              | Split (Split ratio 20:1)                  |            |                                    | Split (Split ratio 20:1)          |            |                                    | Split (Split ratio 20:1)          |            |                                    | Split (Split ratio 20:1)          |            |                 |
| <b>GC Column</b>                   | Rate (°C/min)                             | Temp. (°C) | Hold Time (Min)                    | Rate (°C/min)                     | Temp. (°C) | Hold Time (Min)                    | Rate (°C/min)                     | Temp. (°C) | Hold Time (Min)                    | Rate (°C/min)                     | Temp. (°C) | Hold Time (Min) |
| <b>GC oven program</b>             | 0                                         | 35         | 0.5                                | 0                                 | 35         | 0.5                                | 0                                 | 35         | 0.5                                | 0                                 | 35         | 0.5             |
|                                    | 10                                        | 150        | 2.5                                | 10                                | 150        | 2.5                                | 10                                | 150        | 2.5                                | 10                                | 150        | 2.5             |
|                                    | 75                                        | 240        | 5.0                                | 75                                | 240        | 5.0                                | 75                                | 240        | 5                                  | 75                                | 240        | 5.0             |
| <b>Injection Temperature</b>       | 250 °C                                    |            |                                    | 250 °C                            |            |                                    | 250 °C                            |            |                                    | 250 °C                            |            |                 |
| <b>Injection Volume</b>            | 1 µl                                      |            |                                    | 1 µl                              |            |                                    | 1 µl                              |            |                                    | 1 µl                              |            |                 |
| <b>Detector - FID</b>              | <b>FID Conditions:</b>                    |            |                                    | <b>FID Conditions:</b>            |            |                                    | <b>FID Conditions:</b>            |            |                                    | <b>FID Conditions:</b>            |            |                 |
|                                    | Temperature 300 <sup>0</sup> C            |            |                                    | Temperature 300 <sup>0</sup> C    |            |                                    | Temperature 300 <sup>0</sup> C    |            |                                    | Temperature 300 <sup>0</sup> C    |            |                 |
|                                    | Hydrogen at 30 ml/min                     |            |                                    | Hydrogen at 30 ml/min             |            |                                    | Hydrogen at 30 ml/min             |            |                                    | Hydrogen at 30 ml/min             |            |                 |
|                                    | Air at 400 ml/min                         |            |                                    | Air at 400 ml/min                 |            |                                    | Air at 400 ml/min                 |            |                                    | Air at 400 ml/min                 |            |                 |
| Nitrogen Make up gas at 25 ml/min. |                                           |            | Nitrogen Make up gas at 25 ml/min. |                                   |            | Nitrogen Make up gas at 25 ml/min. |                                   |            | Nitrogen Make up gas at 25 ml/min. |                                   |            |                 |

2

1 Table S3b: Details of several trials performed to optimize the GC conditions for the separation of 40 solvents.

| Trials                                   | Temperature gradient optimization (Rate °C/min) |                   |                                    |                                   |                   |                                    |                                   |                   |                        |
|------------------------------------------|-------------------------------------------------|-------------------|------------------------------------|-----------------------------------|-------------------|------------------------------------|-----------------------------------|-------------------|------------------------|
|                                          | Trial-5 (Figure-S8)                             |                   |                                    | Trial-6 (Figure-S9)               |                   |                                    | Trial-7 (Figure-S10)              |                   |                        |
| <b>Instrument</b>                        | Agilent GC system                               |                   |                                    | Agilent GC system                 |                   |                                    | Agilent GC system                 |                   |                        |
| <b>Column</b>                            | VF-624 to HP-5 dual columns setup               |                   |                                    | VF-624 to HP-5 dual columns setup |                   |                                    | VF-624 to HP-5 dual columns setup |                   |                        |
| <b>Carrier Gas</b>                       | Helium                                          |                   |                                    | Helium                            |                   |                                    | Helium                            |                   |                        |
| <b>Column flow</b>                       | 5.0 ml at constant flow of Helium               |                   |                                    | 5.0 ml at constant flow of Helium |                   |                                    | 5.0 ml at constant flow of Helium |                   |                        |
| <b>Injection Volume</b>                  | 1µl                                             |                   |                                    | 1µl                               |                   |                                    | 1µl                               |                   |                        |
| <b>Injection Mode</b>                    | Split (Split ratio 20:1)                        |                   |                                    | Split (Split ratio 20:1)          |                   |                                    | Split (Split ratio 20:1)          |                   |                        |
| <b>GC Column</b>                         | <b>Rate (°C/min)</b>                            | <b>Temp. (°C)</b> | <b>Hold Time (Min)</b>             | <b>Rate (°C/min)</b>              | <b>Temp. (°C)</b> | <b>Hold Time (Min)</b>             | <b>Rate (°C/min)</b>              | <b>Temp. (°C)</b> | <b>Hold Time (Min)</b> |
| <b>Oven temperature gradient program</b> | 0                                               | 40                | 0.5                                | 0                                 | 50                | 5.0                                | 0                                 | 40                | 5.0                    |
|                                          | 10                                              | 90                | 1.0                                | 3                                 | 65                | 1.0                                | 3                                 | 48                | 0.5                    |
|                                          | 10                                              | 115               | 1.0                                | 7                                 | 115               | 1.0                                | 5                                 | 65                | 0.0                    |
|                                          | 10                                              | 125               | 1.0                                | 10                                | 125               | 1.0                                | 10                                | 75                | 0.5                    |
|                                          | 5                                               | 135               | 1.0                                | 5                                 | 135               | 1.0                                | 5                                 | 80                | 1.0                    |
|                                          | 10                                              | 150               | 1.0                                | 10                                | 150               | 1.0                                | 10                                | 95                | 1.0                    |
|                                          | 70                                              | 240               | 5.0                                | 70                                | 240               | 5.0                                | 20                                | 115               | 5.0                    |
|                                          |                                                 |                   |                                    |                                   |                   |                                    | 50                                | 240               | 5.0                    |
| <b>Injection Temperature</b>             | 250 °C                                          |                   |                                    | 250 °C                            |                   |                                    | 250 °C                            |                   |                        |
| <b>Injection Volume</b>                  | 1µl                                             |                   |                                    | 1µl                               |                   |                                    | 1µl                               |                   |                        |
| <b>Detector-FID</b>                      | <b>FID Conditions:</b>                          |                   |                                    | <b>FID Conditions:</b>            |                   |                                    | <b>FID Conditions:</b>            |                   |                        |
|                                          | Temperature 300 °C                              |                   |                                    | Temperature 300 °C                |                   |                                    | Temperature 300 °C                |                   |                        |
|                                          | Hydrogen at 30 ml/min                           |                   |                                    | Hydrogen at 30 ml/min             |                   |                                    | Hydrogen at 30 ml/min             |                   |                        |
|                                          | Air at 400 ml/min                               |                   |                                    | Air at 400 ml/min                 |                   |                                    | Air at 400 ml/min                 |                   |                        |
| Nitrogen Make up gas at 25 ml/min.       |                                                 |                   | Nitrogen Make up gas at 25 ml/min. |                                   |                   | Nitrogen Make up gas at 25 ml/min. |                                   |                   |                        |

2  
3  
4

1 Table S4: Summary table of solvent retention times in Figures S1–S4 and resolution status.

| Sr. No | VF 624 using Agilent GC-FID (Figure-S1) |          | HP-5 using Agilent GC-FID (Figure-S2) |          | Dual (VF-624 to HP-5) using Agilent GC-FID (Figure-S3) |          | Dual (HP-5 to VF-624) using Agilent GC-FID (Figure-S4) |          |
|--------|-----------------------------------------|----------|---------------------------------------|----------|--------------------------------------------------------|----------|--------------------------------------------------------|----------|
|        | Peak Name                               | RT (min) | Peak Name                             | RT (min) | Peak Name                                              | RT (min) | Peak Name                                              | RT (min) |
| 1      | Methanol                                | 2.67     | Methanol                              | 1.74     | Methanol                                               | 7.66     | Methanol                                               | 7.28     |
| 2      | Pentane                                 | 3.46     | Ethanol                               | 2.07     | Ethanol                                                | 8.79     | Ethanol                                                | 8.12     |
| 3      | Ethanol                                 | 3.55     | Acetone                               | 2.35     | Pentane                                                | 8.86     | Isopropyl alcohol                                      | 8.76     |
| 4      | Diethyl ether                           | 3.71     | Acetonitrile                          | 2.38     | Diethyl ether                                          | 9.12     | Acetone                                                | 8.77     |
| 5      | Acetone                                 | 4.06     | Isopropyl alcohol                     | 2.42     | Acetone                                                | 9.45     | Diethyl ether                                          | 8.77     |
| 6      | Isopropyl alcohol                       | 4.23     | Diethyl ether                         | 2.52     | Isopropyl alcohol                                      | 9.56     | Acetonitrile                                           | 8.85     |
| 7      | Acetonitrile                            | 4.41     | 1-Butanol                             | 2.72     | Acetonitrile                                           | 9.79     | t-Butanol                                              | 9.25     |
| 8      | Methyl acetate                          | 4.45     | Methyl acetate                        | 2.80     | Methyl acetate                                         | 9.90     | Methyl acetate                                         | 9.29     |
| 9      | Dichloromethane                         | 4.62     | Dichloromethane                       | 2.87     | Dichloromethane                                        | 10.01    | Dichloromethane                                        | 9.46     |
| 10     | t-Butanol                               | 4.73     | 1-Propanol                            | 3.17     | t-Butanol                                              | 10.11    | 1-Propanol                                             | 9.87     |
| 11     | t-Butyl methyl ether                    | 4.92     | t-Butyl methyl ether                  | 3.35     | t-Butyl methyl ether                                   | 10.47    | t-Butyl methyl ether                                   | 9.96     |
| 12     | Hexane                                  | 5.25     | Methylethylketone                     | 3.78     | 1-Propanol                                             | 10.85    | Hexane                                                 | 10.46    |
| 13     | Iso-propyl ether                        | 5.48     | Hexane                                | 3.80     | Iso-propyl ether                                       | 10.85    | Iso-propyl ether                                       | 10.51    |
| 14     | 1-Propanol                              | 5.48     | Iso-propyl ether                      | 3.90     | Hexane                                                 | 11.00    | Methylethylketone                                      | 10.65    |
| 15     | Methyl cyclopentane                     | 5.93     | Ethyl acetate                         | 4.10     | Methylethylketone                                      | 11.55    | Ethyl acetate                                          | 10.84    |
| 16     | Methylethylketone                       | 6.04     | Cyclohexane                           | 4.32     | Ethyl acetate                                          | 11.55    | Methyl cyclopentane                                    | 11.20    |
| 17     | Ethyl acetate                           | 6.08     | Tetrahydrofuran                       | 4.38     | Methyl cyclopentane                                    | 11.63    | Tetrahydrofuran                                        | 11.29    |
| 18     | Tetrahydrofuran                         | 6.31     | Isopropyl acetate                     | 4.98     | Tetrahydrofuran                                        | 11.95    | Isopropyl acetate                                      | 11.75    |
| 19     | Cyclohexane                             | 6.66     | t-Butanol                             | 5.02     | 2-Methyl-1-propanol                                    | 12.24    | 1-Butanol                                              | 11.90    |
| 20     | 2-Methyl-1-propanol                     | 6.84     | 2-Methyl tetrahydrofuran              | 5.15     | Cyclohexane                                            | 12.41    | Cyclohexane                                            | 11.94    |
| 21     | Isopropyl acetate                       | 7.01     | Methyl cyclopentane                   | 5.67     | Isopropyl acetate                                      | 12.48    | 2-Methyl tetrahydrofuran                               | 12.08    |
| 22     | 2-Methyl tetrahydrofuran                | 7.10     | t-Butyl acetate                       | 5.75     | Heptane                                                | 12.75    | Heptane                                                | 12.43    |
| 23     | Heptane                                 | 7.26     | 1,4-Dioxane                           | 5.84     | 2-Methyl tetrahydrofuran                               | 12.89    | t-Butyl acetate                                        | 12.56    |
| 24     | 1-Butanol                               | 7.53     | Butyl acetate                         | 6.31     | n-Butanol                                              | 12.96    | 1,4-Dioxane                                            | 12.88    |
| 25     | t-Butyl acetate                         | 7.75     | 3-Methyl-1-butanol                    | 6.78     | t-Butyl acetate                                        | 13.29    | 3-Methyl-1-butanol                                     | 13.35    |
| 26     | 1,4-Dioxane                             | 7.99     | Toluene                               | 6.79     | 1,4-Dioxane                                            | 13.68    | Dimethylacetamide                                      | 13.45    |
| 27     | 2-Ethoxy propanol                       | 8.85     | 2-Methyl-1-propanol                   | 6.90     | 2-Ethoxy propanol                                      | 14.42    | Ethylene glycol                                        | 13.54    |
| 28     | Toluene                                 | 9.02     | 1-Pentanol                            | 6.90     | 3-Methyl-1-butanol                                     | 14.49    | Butyl acetate                                          | 13.72    |
| 29     | 3-Methyl-1-butanol                      | 9.40     | Pentane                               | 6.93     | Ethylene glycol                                        | 14.71    | 2-Methyl-1-propanol                                    | 14.03    |
| 30     | 1-Pentanol                              | 9.40     | 2-Ethoxy propanol                     | 6.99     | Toluene                                                | 14.89    | 1-Pentanol                                             | 14.05    |
| 31     | 2-Hexanone                              | 9.47     | Dimethylformamide                     | 7.16     | 1-Pentanol                                             | 14.98    | Pentane                                                | 14.06    |
| 32     | Butyl acetate                           | 9.60     | Ethylene glycol                       | 7.24     | 2-Hexanone                                             | 15.35    | 2-Ethoxy propanol                                      | 14.21    |
| 33     | Ethylene glycol                         | 9.71     | 2-Hexanone                            | 7.33     | Butyl acetate                                          | 15.50    | Toluene                                                | 14.29    |
| 34     | Cyclopentanone                          | 10.17    | Cyclopentanone                        | 7.38     | Cyclopentanone                                         | 15.67    | 2-Hexanone                                             | 14.63    |
| 35     | Dimethylformamide                       | 10.68    | Dimethyl sulfoxide                    | 8.07     | Dimethylformamide                                      | 15.74    | Dimethylformamide                                      | 14.79    |
| 36     | Ethylbenzene                            | 10.84    | Heptane                               | 8.46     | Ethylbenzene                                           | 16.45    | Cyclopentanone                                         | 14.92    |
| 37     | p-Xylene                                | 11.27    | Ethylbenzene                          | 8.67     | p-Xylene                                               | 16.60    | Dimethyl sulfoxide                                     | 15.77    |
| 38     | o-Xylene                                | 11.42    | Dimethylacetamide                     | 8.71     | Dimethyl sulfoxide                                     | 16.97    | Ethylbenzene                                           | 15.87    |
| 39     | Dimethyl sulfoxide                      | 11.54    | p-Xylene                              | 8.80     | o-Xylene                                               | 17.08    | p-Xylene                                               | 15.98    |
| 40     | Dimethylacetamide                       | 11.60    | o-Xylene                              | 9.20     | Dimethylacetamide                                      | 17.26    | o-Xylene                                               | 16.38    |

2

3

4 RT – Retention time.

5 Peak resolution status: Black colour solvents are well separated (resolution > 1.5), Blue colour solvents are partially separated (resolution between 1.0 to 1.5), and Red colour solvents are merged (not separated, resolution < 1.0).

6



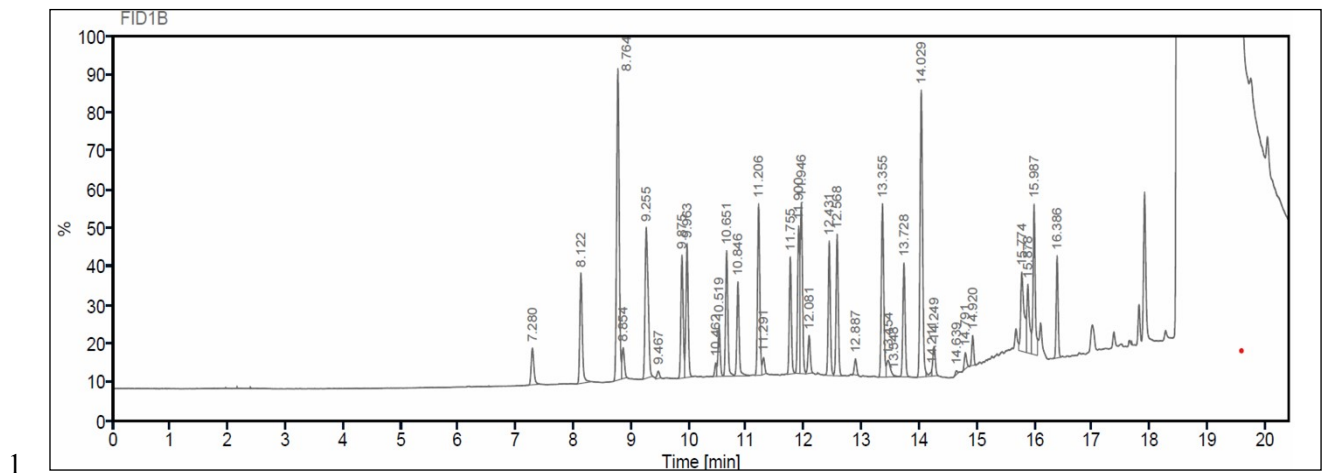

1  
 2 Figure S4: Chromatogram of 40 solvents on a dual-column configuration, HP-5 to VF-624 with an Agilent GC-FID instrument (Trial-  
 3 1, Table S3a).

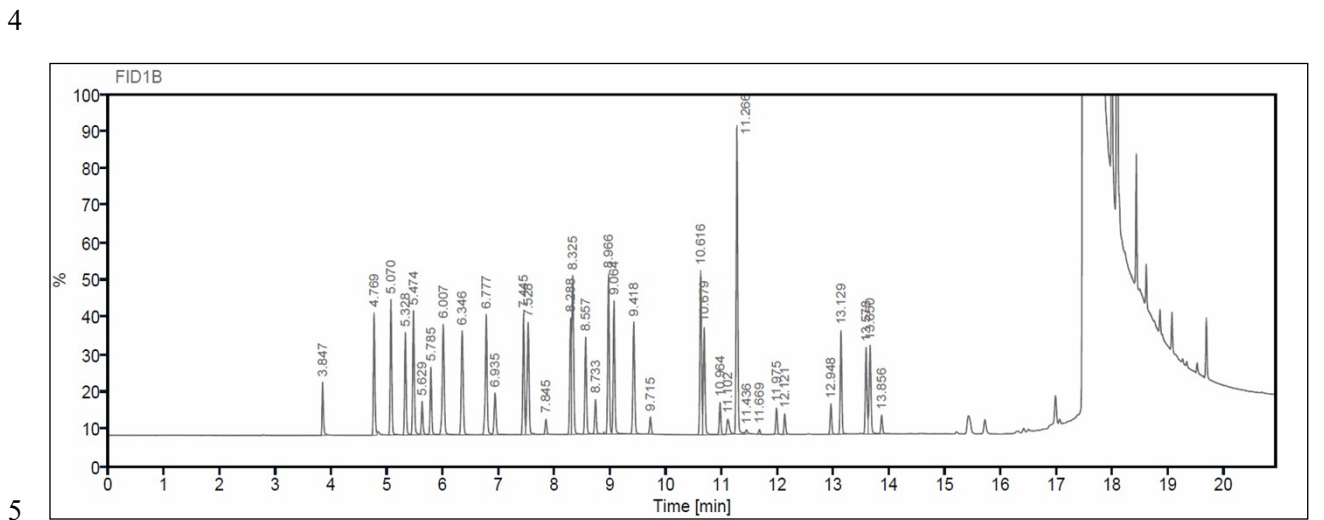

5  
 6 Figure S5: Chromatogram of 40 solvents on a dual-column configuration, VF-624 to HP5 with an Agilent GC-FID instrument, trial-1  
 7 with flow rate of 3.5ml/min. (Trial-2, Table S3a).

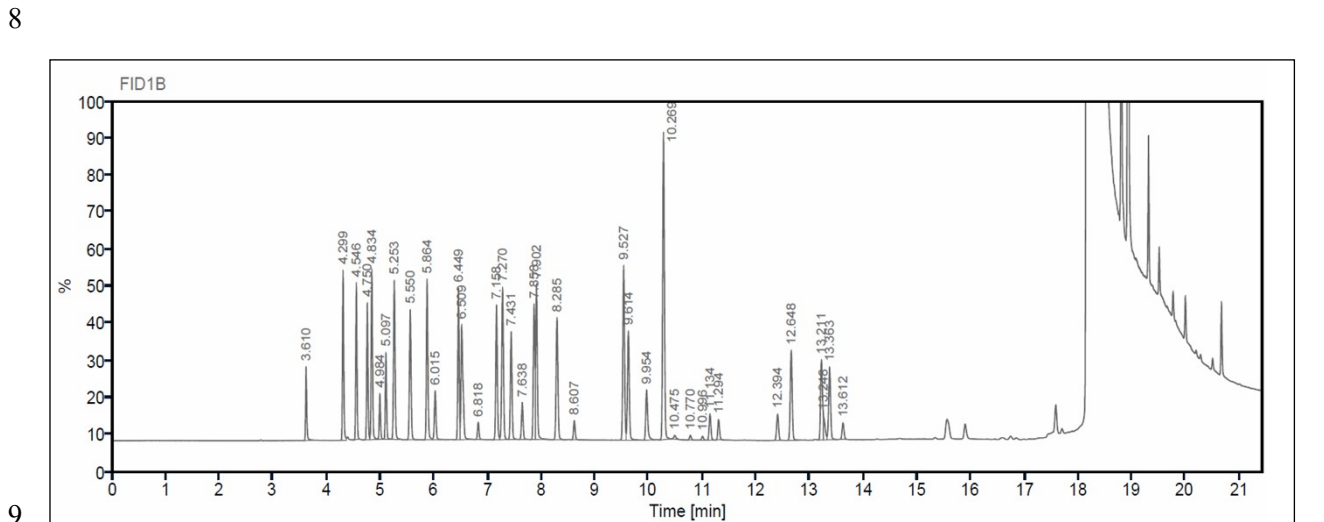

9  
 10 Figure S6: Chromatogram of 40 solvents on a dual-column configuration, VF-624 to HP5 with an Agilent GC-FID instrument with  
 11 flow rate of 4.0ml/min (Trial-3, Table S3a).

12

1

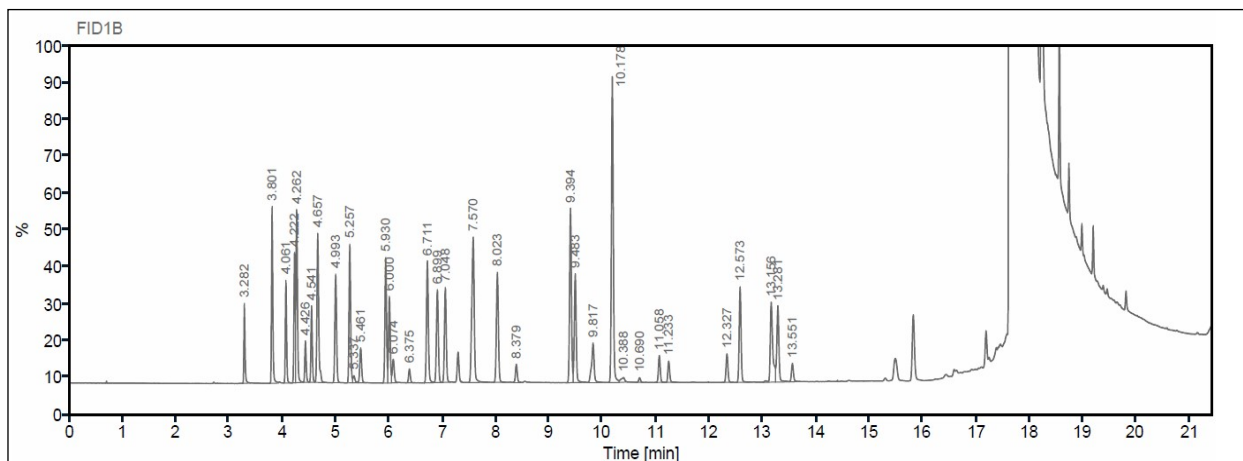

2 Figure S7: Chromatogram of 40 solvents on a dual-column configuration, VF-624 to HP5 with an Agilent GC-FID instrument with  
3 flow rate of 5.0ml/min (Trial-4, Table S3a).

4

5

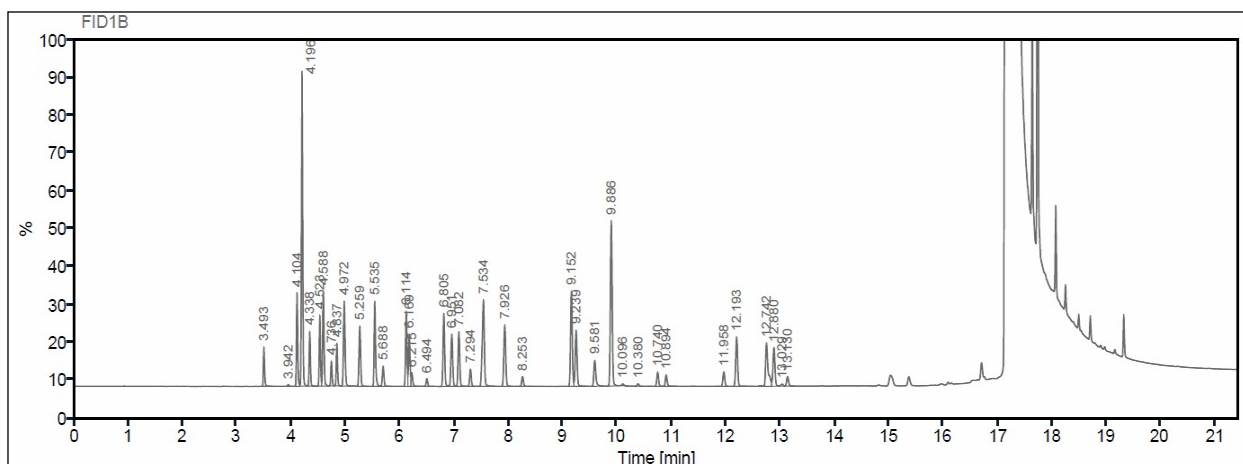

6 Figure S8: Chromatogram of 40 solvents on a dual-column configuration, VF-624 to HP5 with an Agilent GC-FID instrument with  
7 modified oven program (Trial-5, Table S3b).

8

9

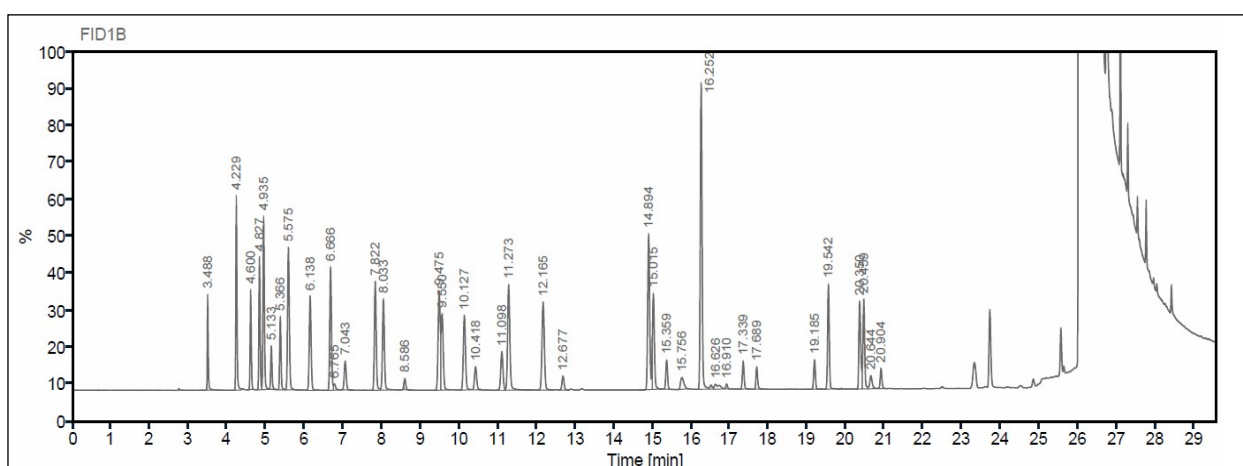

10 Figure S9: Chromatogram of 40 solvents on a dual-column configuration, VF-624 to HP5 with an Agilent GC-FID instrument with  
11 modified oven program (Trial-6, Table S3b).

12

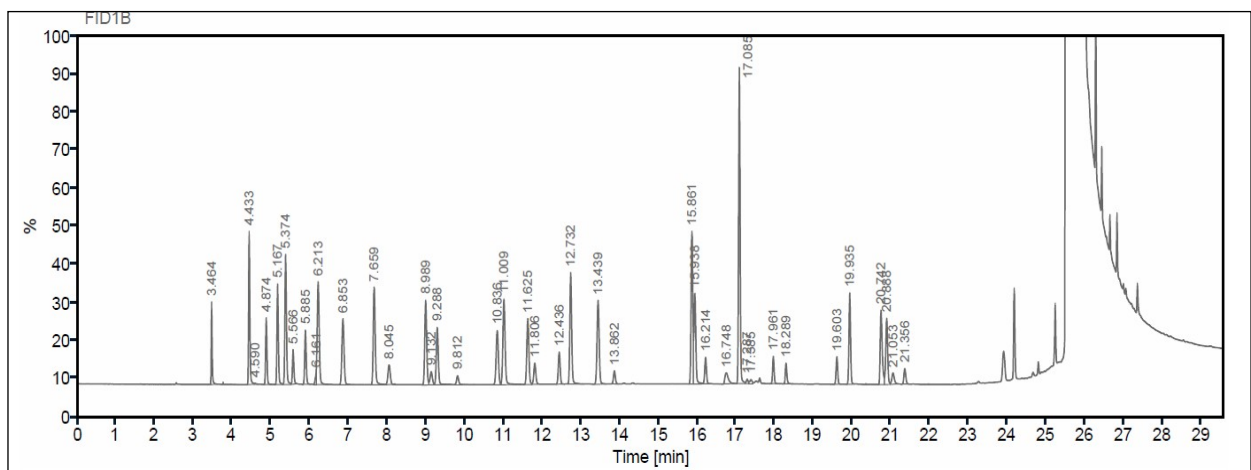

1  
 2 Figure S10: Chromatogram of 40 solvents on a dual-column configuration, VF-624 to HP5 with an Agilent GC-FID instrument with  
 3 final optimized oven program (Trial-7, Table S3b).

4

5

1 **Table S5: Summary table of solvent retention times in Figures S10 and resolution status.**

| VF-624 to HP-5 using Agilent GC-FID -<br>Optimized method (Trial 7 Table S3b). |                          |          |
|--------------------------------------------------------------------------------|--------------------------|----------|
| Sr. No                                                                         | Peak Name                | RT (min) |
| 1                                                                              | Methanol                 | 3.46     |
| 2                                                                              | Ethanol                  | 4.43     |
| 3                                                                              | Pentane                  | 4.59     |
| 4                                                                              | Diethyl ether            | 4.87     |
| 5                                                                              | Acetone                  | 5.16     |
| 6                                                                              | Isopropyl alcohol        | 5.37     |
| 7                                                                              | Acetonitrile             | 5.56     |
| 8                                                                              | Methyl acetate           | 5.88     |
| 9                                                                              | Dichloromethane          | 6.16     |
| 10                                                                             | t-Butanol                | 6.21     |
| 11                                                                             | t-Butyl methyl ether     | 6.85     |
| 12                                                                             | 1-Propanol               | 7.66     |
| 13                                                                             | Hexane                   | 8.04     |
| 14                                                                             | Isopropyl ether          | 8.99     |
| 15                                                                             | Methyl cyclopentane      | 9.13     |
| 16                                                                             | Methylethylketone        | 9.29     |
| 17                                                                             | Tetrahydrofuran          | 9.81     |
| 18                                                                             | Ethyl acetate            | 10.84    |
| 19                                                                             | Cyclohexane              | 11.01    |
| 20                                                                             | 2-Methyl-1-propanol      | 11.63    |
| 21                                                                             | t-Butyl acetate          | 11.81    |
| 22                                                                             | 2-Methyl tetrahydrofuran | 12.44    |
| 23                                                                             | Heptane                  | 12.73    |
| 24                                                                             | 1-Butanol                | 13.44    |
| 25                                                                             | 1,4-Dioxane              | 13.86    |
| 26                                                                             | Isopropyl acetate        | 15.86    |
| 27                                                                             | Butyl acetate            | 15.94    |
| 28                                                                             | Toluene                  | 16.21    |
| 29                                                                             | 1-Pentanol               | 16.75    |
| 30                                                                             | 3-Methyl-1-butanol       | 17.08    |
| 31                                                                             | 2-Ethoxy propanol        | 17.29    |
| 32                                                                             | 2-Hexanone               | 17.38    |
| 33                                                                             | Ethylene glycol          | 17.96    |
| 34                                                                             | Cyclopentanone           | 18.29    |
| 35                                                                             | Dimethylformamide        | 19.60    |
| 36                                                                             | Ethylbenzene             | 19.93    |
| 37                                                                             | p-Xylene                 | 20.74    |
| 38                                                                             | o-Xylene                 | 20.89    |
| 39                                                                             | Dimethyl sulfoxide       | 21.05    |
| 40                                                                             | Dimethylacetamide        | 21.36    |

2

3 Peak resolution status: Black colour solvents are well separated (resolution >1.5), and Blue colour solvents are partially separated  
4 (resolution between 1.0 to 1.5).

5

1 Table S6: Details of optimized method parameters used with Thermo GC-FID-MS for the separation of 57 solvents.

| Trials                                   | Temperature gradient optimization (Rate °C/min) |            |                 |
|------------------------------------------|-------------------------------------------------|------------|-----------------|
|                                          | Trail-8 (Figure-2, and Figure S11 to S15)       |            |                 |
| <b>Instrument</b>                        | Thermo scientific GC                            |            |                 |
| <b>Column</b>                            | VF-624 to HP-5 dual columns setup               |            |                 |
| <b>Carrier Gas</b>                       | Helium                                          |            |                 |
| <b>Column flow</b>                       | 5.0 ml at constant flow of Helium               |            |                 |
| <b>Injection Volume</b>                  | 1µl                                             |            |                 |
| <b>Injection Mode</b>                    | Split (Split ratio 35:1)                        |            |                 |
| <b>GC Column</b>                         | Rate (°C/min)                                   | Temp. (°C) | Hold Time (Min) |
| <b>Oven temperature gradient program</b> | 0                                               | 40         | 5.0             |
|                                          | 2                                               | 45         | 2.0             |
|                                          | 3                                               | 48         | 0.5             |
|                                          | 5                                               | 65         | 0.0             |
|                                          | 10                                              | 70         | 1.0             |
|                                          | 5                                               | 80         | 0.0             |
|                                          | 10                                              | 95         | 1.0             |
|                                          | 20                                              | 115        | 5.0             |
| 50                                       | 240                                             | 5.0        |                 |
| <b>Injection Temperature</b>             | 250 °C                                          |            |                 |
| <b>Injection Volume</b>                  | 1µl                                             |            |                 |
| <b>Detector- FID</b>                     | <b>FID Conditions:</b>                          |            |                 |
|                                          | Temperature 300 °C                              |            |                 |
|                                          | Hydrogen at 30 ml/min                           |            |                 |
|                                          | Air at 400 ml/min                               |            |                 |
|                                          | Helium Make up gas at 25 ml/min.                |            |                 |
| <b>Detector - MS</b>                     | <b>MS - Scan Mode:</b>                          |            |                 |
|                                          | Interface Temperature is 280 °C                 |            |                 |
|                                          | Ion Source Temperature is 250 °C                |            |                 |
|                                          | Scan Range: m/z 31-200                          |            |                 |
|                                          | Acquisition Mode: Full Scan                     |            |                 |

2

3

1 Table S7: Summary table of solvent retention times in Figures S11–S15, Figure 2, and Figure 3 with their resolution status.

| Sr. No | VF 624 using GC-FID, and MS (scan) detectors (Figure-S11, and S12) |          | HP 5 using FID, and MS (scan) detectors (Figure-S13, and 14) |          | Dual Column, VF-624 to HP-5 using FID, MS (SIM), and MS (scan) detectors (Figure-2, 3, and S15) |          |
|--------|--------------------------------------------------------------------|----------|--------------------------------------------------------------|----------|-------------------------------------------------------------------------------------------------|----------|
|        | Peak Name                                                          | RT (Min) | Peak Name                                                    | RT (Min) | Peak Name                                                                                       | RT (Min) |
| 1      | Methanol                                                           | 4.64     | Methanol                                                     | 4.53     | Methanol                                                                                        | 5.22     |
| 2      | Pentane                                                            | 5.97     | Ethanol                                                      | 5.23     | Ethanol                                                                                         | 6.65     |
| 3      | Ethanol                                                            | 6.15     | Acetonitrile                                                 | 5.84     | Pentane                                                                                         | 6.87     |
| 4      | Ethyl ether                                                        | 6.44     | Isopropyl alcohol                                            | 5.85     | Ethyl ether                                                                                     | 7.27     |
| 5      | 1,2-Dichloroethene                                                 | 7.02     | Acetone                                                      | 5.86     | 1,2-Dichloroethene                                                                              | 7.67     |
| 6      | Acetone                                                            | 7.14     | Pentane                                                      | 5.86     | Acetone                                                                                         | 7.67     |
| 7      | Isopropyl alcohol                                                  | 7.52     | Ethyl ether                                                  | 6.19     | Isopropyl alcohol                                                                               | 7.99     |
| 8      | Ethylformate                                                       | 7.52     | Ethylformate                                                 | 6.46     | Methyl acetate                                                                                  | 8.68     |
| 9      | Acetonitrile                                                       | 7.91     | t-Butanol                                                    | 6.59     | t-Butanol                                                                                       | 9.07     |
| 10     | Methyl acetate                                                     | 7.99     | Methyl acetate                                               | 6.77     | Dichloromethane                                                                                 | 9.15     |
| 11     | Dichloromethane                                                    | 8.39     | Dichloromethane                                              | 6.92     | Ethylformate                                                                                    | 9.21     |
| 12     | t-Butanol                                                          | 8.69     | 1-Propanol                                                   | 7.58     | Acetonitrile                                                                                    | 9.21     |
| 13     | Methyl tert-butyl ether                                            | 9.17     | Nitromethane                                                 | 7.64     | Methyl tert-butyl ether                                                                         | 10.07    |
| 14     | Hexane                                                             | 10.08    | Methyl tert-butyl ether                                      | 8.01     | Hexane                                                                                          | 11.22    |
| 15     | Isopropyl ether                                                    | 10.75    | Hexane                                                       | 8.87     | 1-Propanol                                                                                      | 11.22    |
| 16     | 1-Propanol                                                         | 10.87    | Methyl ethyl ketone                                          | 9.09     | Isopropyl ether                                                                                 | 11.75    |
| 17     | Methyl ethyl ketone                                                | 12.52    | 2-Butanol                                                    | 9.25     | Nitromethane                                                                                    | 12.42    |
| 18     | Nitromethane                                                       | 12.69    | Isopropyl ether                                              | 9.38     | Methyl ethyl ketone                                                                             | 12.98    |
| 19     | 2-Butanol                                                          | 13.20    | Ethyl acetate                                                | 9.99     | Ethyl acetate                                                                                   | 13.37    |
| 20     | Tetrahydrofuran                                                    | 13.28    | Trichloromethane                                             | 10.08    | 2-Butanol                                                                                       | 13.64    |
| 21     | Trichloromethane                                                   | 13.60    | 2-Methyl-1-propanol                                          | 10.62    | Tetrahydrofuran                                                                                 | 14.09    |
| 22     | 2,2-Dimethoxypropane                                               | 14.00    | Tetrahydrofuran                                              | 10.86    | Trichloromethane                                                                                | 14.29    |
| 23     | Cyclohexane                                                        | 14.22    | 2-Methoxyethanol                                             | 10.91    | 2,2-Dimethoxypropane                                                                            | 15.18    |
| 24     | 2-Methyl-1-propanol                                                | 15.02    | 1,2-Dichloroethene                                           | 11.98    | Cyclohexane                                                                                     | 15.35    |
| 25     | Benzene                                                            | 15.12    | 2,2-Dimethoxypropane                                         | 12.24    | 2-Methyl-1-propanol                                                                             | 15.55    |
| 26     | 1,2-Dimethoxyethane                                                | 15.17    | 1,2-Dimethoxyethane                                          | 12.27    | 2-Methoxyethanol                                                                                | 15.55    |
| 27     | 2-Methoxyethanol                                                   | 15.31    | 1-Butanol                                                    | 12.46    | Benzene                                                                                         | 15.89    |
| 28     | Isopropyl acetate                                                  | 15.39    | Benzene                                                      | 12.62    | 1,2-Dimethoxyethane                                                                             | 16.07    |
| 29     | Isooctane                                                          | 15.41    | Cyclohexane                                                  | 12.65    | Isopropyl acetate                                                                               | 16.29    |
| 30     | 2-Methyl tetrahydrofuran                                           | 15.53    | Isopropyl acetate                                            | 12.71    | 2-Methyl tetrahydrofuran                                                                        | 16.69    |
| 31     | Triethylamine                                                      | 15.64    | 2-Methyl tetrahydrofuran                                     | 13.21    | Triethylamine                                                                                   | 16.7     |
| 32     | Heptane                                                            | 16.07    | Isooctane                                                    | 14.04    | Isooctane                                                                                       | 16.76    |
| 33     | Ethyl acetate                                                      | 17.04    | Triethylamine                                                | 14.16    | Heptane                                                                                         | 17.35    |
| 34     | 1-Butanol                                                          | 17.04    | Heptane                                                      | 14.69    | 1-Butanol                                                                                       | 17.74    |
| 35     | 1,1,2-Trichloroethene                                              | 17.08    | 1,1,2-Trichloroethene                                        | 14.88    | 1,1,2-Trichloroethene                                                                           | 18.22    |
| 36     | Methylcyclohexane                                                  | 17.78    | 1,4-Dioxane                                                  | 15.22    | Methylcyclohexane                                                                               | 19.04    |
| 37     | 1,4-Dioxane                                                        | 18.18    | n-Propylacetate                                              | 15.51    | 1,4-Dioxane                                                                                     | 19.04    |
| 38     | n-Propylacetate                                                    | 18.41    | 2-Ethoxyethanol                                              | 15.51    | 3-Methyl-1-butanol                                                                              | 19.09    |
| 39     | 2-Ethoxyethanol                                                    | 19.28    | Methylcyclohexane                                            | 16.12    | n-Propylacetate                                                                                 | 19.34    |
| 40     | Cyclopentyl methyl ether                                           | 20.22    | 3-Methyl-1-butanol                                           | 16.60    | 2-Ethoxyethanol                                                                                 | 19.95    |
| 41     | Methylisobutylketone                                               | 20.26    | Methylisobutylketone                                         | 16.94    | Methylisobutylketone                                                                            | 21.24    |
| 42     | Pyridine                                                           | 20.45    | Pyridine                                                     | 17.43    | Pyridine                                                                                        | 21.34    |
| 43     | 3-Methyl-1-butanol                                                 | 20.53    | 1-Pentanol                                                   | 18.12    | Cyclopentyl methyl ether                                                                        | 21.43    |
| 44     | Toluene                                                            | 20.69    | Ethylene glycol                                              | 18.32    | Toluene                                                                                         | 21.81    |
| 45     | Isobutyl acetate                                                   | 21.12    | Cyclopentyl methyl ether                                     | 18.49    | Isobutyl acetate                                                                                | 22.16    |
| 46     | 1-Pentanol                                                         | 21.69    | Toluene                                                      | 18.50    | 1-Pentanol                                                                                      | 22.73    |
| 47     | 2-Hexanone                                                         | 22.23    | Isobutyl acetate                                             | 18.69    | 2-Hexanone                                                                                      | 23.39    |
| 48     | Ethylene glycol                                                    | 22.43    | Formamide                                                    | 18.75    | Ethylene glycol                                                                                 | 23.53    |
| 49     | n-Butyl acetate                                                    | 22.51    | Dimethylformamide                                            | 19.10    | n-Butyl acetate                                                                                 | 23.84    |
| 50     | Dimethylformamide                                                  | 23.25    | 2-Hexanone                                                   | 19.42    | Formamide                                                                                       | 23.96    |
| 51     | Formamide                                                          | 24.00    | n-Butyl acetate                                              | 20.44    | Dimethylformamide                                                                               | 24.25    |
| 52     | Chlorobenzene                                                      | 24.02    | Dimethyl sulfoxide                                           | 21.36    | Chlorobenzene                                                                                   | 25.62    |
| 53     | p-Xylene                                                           | 24.73    | Chlorobenzene                                                | 21.85    | p-Xylene                                                                                        | 26.49    |
| 54     | Dimethyl sulfoxide                                                 | 26.61    | Dimethylacetamide                                            | 22.58    | Dimethyl sulfoxide                                                                              | 27.4     |
| 55     | Dimethylacetamide                                                  | 26.97    | p-Xylene                                                     | 22.64    | Dimethylacetamide                                                                               | 27.81    |
| 56     | Cumene                                                             | 27.01    | Anisole                                                      | 24.38    | Cumene                                                                                          | 28.14    |
| 57     | Anisole                                                            | 27.18    | Cumene                                                       | 24.73    | Anisole                                                                                         | 28.24    |

2 Peak resolution status: Black colour solvents are well separated (resolution > 1.5), Blue colour solvents are partially separated (resolution  
3 between 1.0 to 1.5), and Red colour solvents are merged (not separated, resolution <1.0).

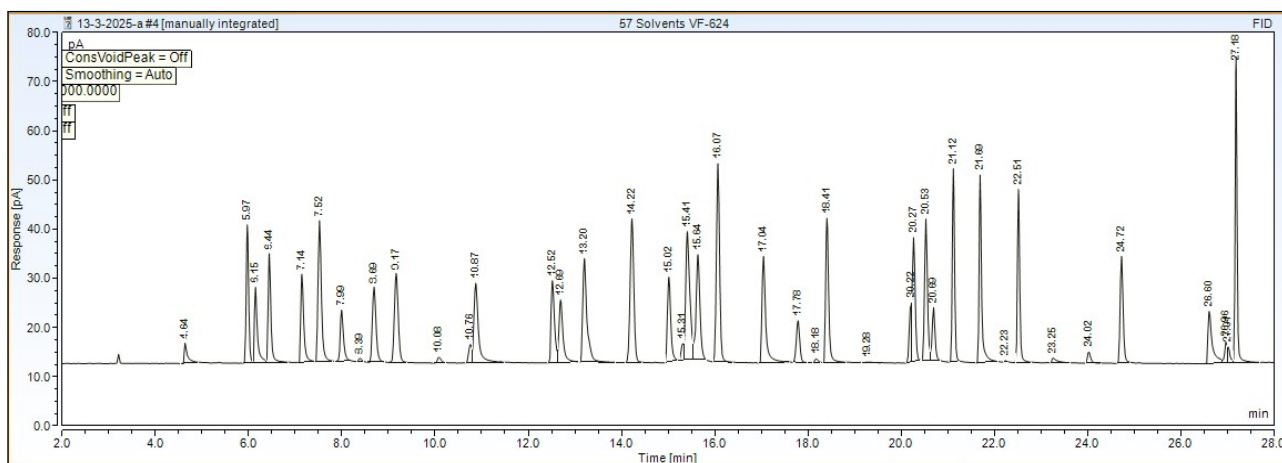

1  
 2 Figure S11: FID detector chromatogram of 57 solvents on a VF-624 with a Thermo GC-FID-MS instrument using the final optimized  
 3 method (Trial-8, Table S6).

4

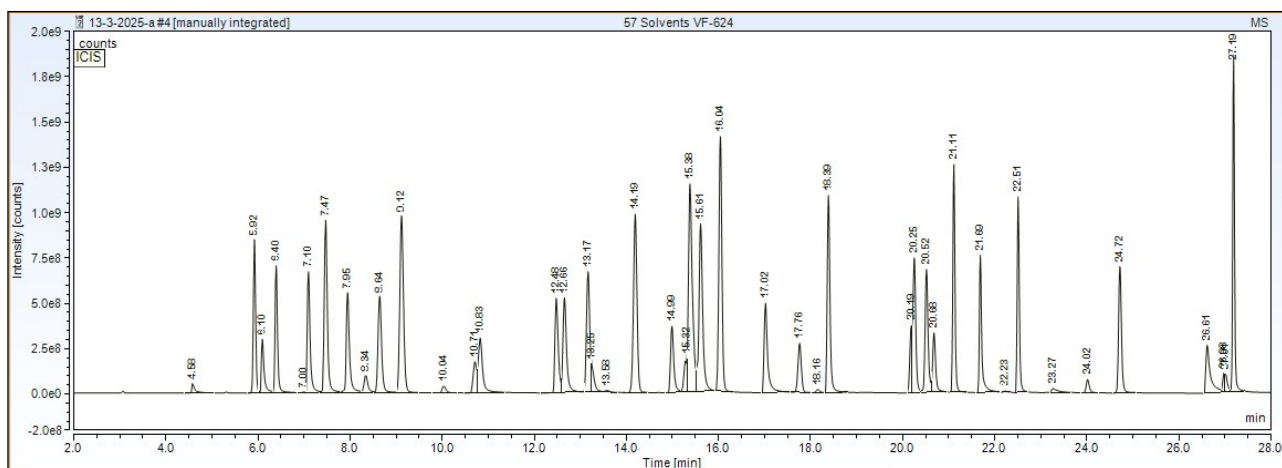

5  
 6 Figure S12: MS (scan mode) chromatogram of 57 solvents on a VF-624 with a Thermo GC-FID-MS instrument using the final optimized  
 7 method (Trial-8, Table S6).

8

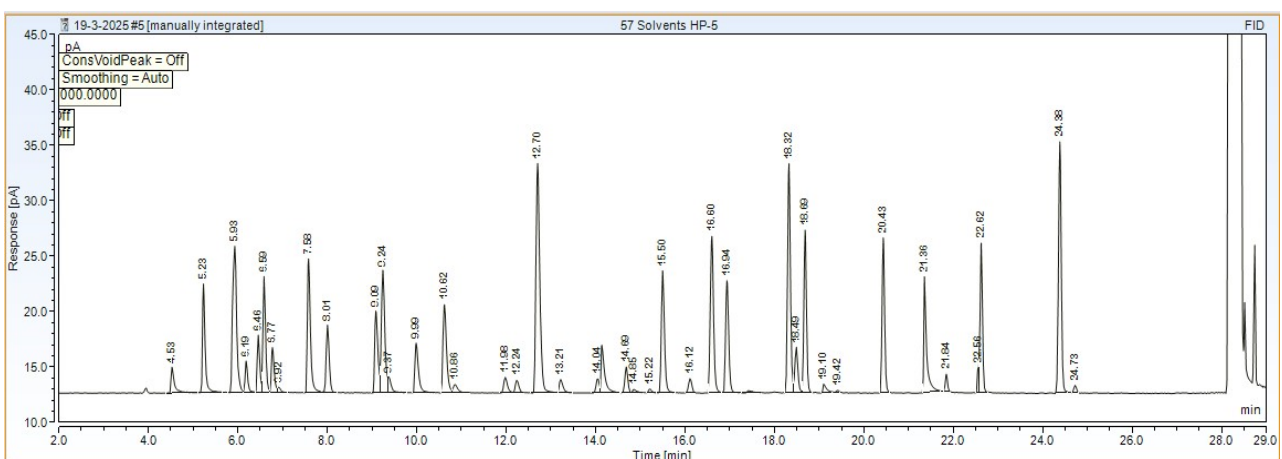

9  
 10 Figure S13: FID detector chromatogram of 57 solvents on an HP-5 with a Thermo GC-FID-MS instrument using the final optimized  
 11 method (Trial-8, Table S6).

12

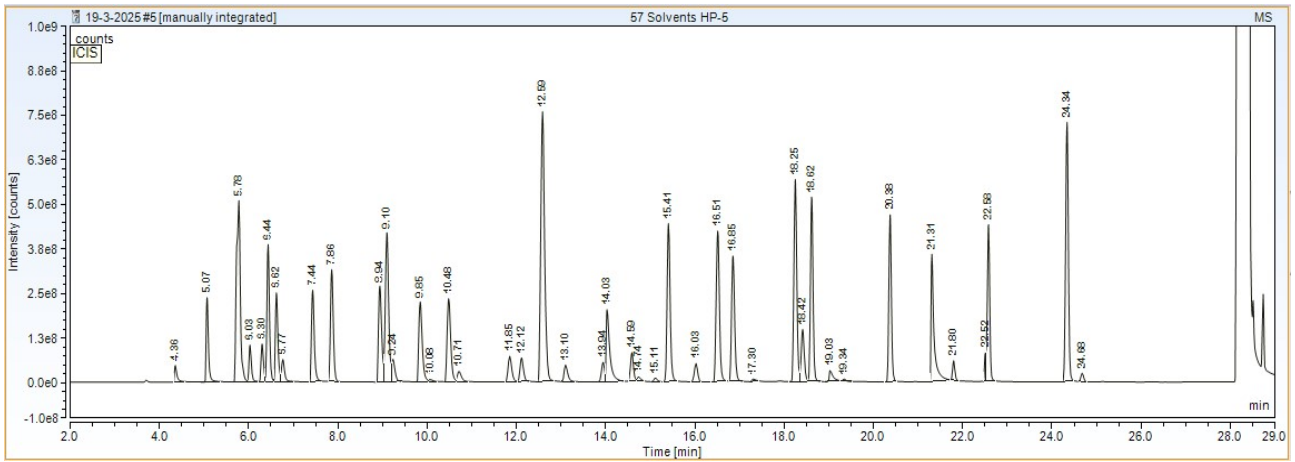

1  
 2 Figure S14: MS (scan mode) chromatogram of 57 solvents on a HP-5 with a Thermo GC-FID-MS instrument using the final optimized  
 3 method (Trial-8, Table S6).  
 4

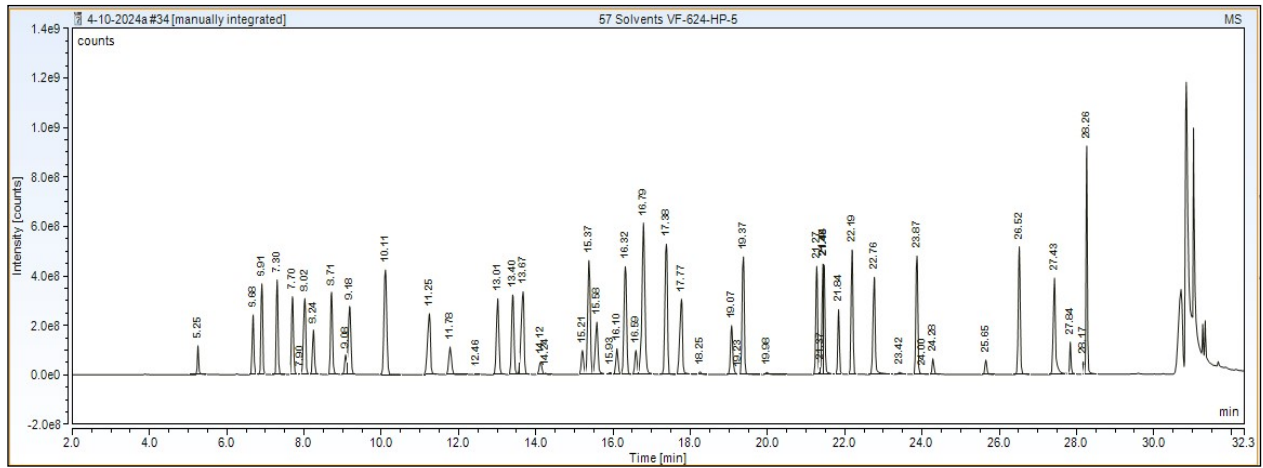

5  
 6 Figure S15: MS (scan mode) chromatogram of 57 solvents on a dual-column configuration, VF-624 to HP5 with a Thermo GC-FID-MS  
 7 instrument using the final optimized method (Trial-8, Table S6).  
 8

1 Table S8: Optimised parameters of GC-MS, SIM mode used for validation study (Figure 3, and 4).  
2

| Sr. No | Peak Name                | RT (min) | Window (min) | Selected ion | Molecular weight |
|--------|--------------------------|----------|--------------|--------------|------------------|
| 1      | Methanol                 | 5.25     | +1.0 to -1.0 | 31.0         | 32.04            |
| 2      | Ethanol                  | 6.68     | +0.5 to -0.5 | 45.0         | 46.07            |
| 3      | Pentane                  | 6.91     | +0.5 to -0.5 | 43.0         | 72.15            |
| 4      | Ethyl ether              | 7.31     | +0.5 to -0.5 | 74.0         | 74.12            |
| 5      | Acetone                  | 7.71     | +0.5 to -0.5 | 43.0         | 58.08            |
| 6      | 1,1-Dichloroethene       | 7.71     | +0.5 to -0.5 | 96.0         | 96.94            |
| 7      | Isopropyl alcohol        | 8.02     | +0.5 to -0.5 | 45.0         | 60.10            |
| 8      | Ethylformate             | 8.24     | +0.5 to -0.5 | 45.0         | 74.08            |
| 9      | Acetonitrile             | 8.25     | +0.5 to -0.5 | 41.0         | 41.05            |
| 10     | Methyl acetate           | 8.71     | +0.5 to -0.5 | 43.0         | 74.08            |
| 11     | Dichloromethane          | 9.08     | +0.5 to -0.5 | 84.0         | 84.93            |
| 12     | t-Butanol                | 9.18     | +0.5 to -0.5 | 59.0         | 74.12            |
| 13     | Methyl tert-butyl ether  | 10.11    | +0.5 to -0.5 | 73.0         | 88.15            |
| 14     | Hexane                   | 11.23    | +0.5 to -0.5 | 57.0         | 86.18            |
| 15     | 1-Propanol               | 11.23    | +0.5 to -0.5 | 59.0         | 60.10            |
| 16     | Iso propyl ether         | 11.78    | +0.5 to -0.5 | 87.0         | 102.18           |
| 17     | Nitromethane             | 12.45    | +0.5 to -0.5 | 61.0         | 61.04            |
| 18     | Methyl ethyl ketone      | 13.01    | +0.5 to -0.5 | 72.0         | 72.11            |
| 19     | Ethyl acetate            | 13.39    | +0.5 to -0.5 | 70.0         | 88.11            |
| 20     | 2-Butanol                | 13.65    | +1.0 to -1.0 | 59.0         | 74.12            |
| 21     | Tetrahydrofuran          | 14.12    | +0.5 to -0.5 | 72.0         | 72.11            |
| 22     | Trichloromethane         | 14.24    | +0.5 to -0.5 | 84.0         | 119.38           |
| 23     | 2,2-Dimethoxy propane    | 15.20    | +0.5 to -0.5 | 89.0         | 104.15           |
| 24     | Cyclohexane              | 15.37    | +0.5 to -0.5 | 84.0         | 84.16            |
| 25     | 2-Methyl-1-propanol      | 15.37    | +0.5 to -0.5 | 43.0         | 74.12            |
| 26     | 2-Methoxy ethanol        | 15.58    | +0.5 to -0.5 | 45.0         | 76.09            |
| 27     | 1,2-Dimethoxy ethane     | 16.09    | +0.5 to -0.5 | 60.0         | 90.12            |
| 28     | Benzene                  | 16.09    | +0.5 to -0.5 | 78.0         | 78.11            |
| 29     | Isopropyl acetate        | 16.31    | +0.5 to -0.5 | 61.0         | 102.13           |
| 30     | 2-Methyl tetrahydrofuran | 16.59    | +0.5 to -0.5 | 71.1         | 86.13            |
| 31     | Iso octane               | 16.73    | +0.5 to -0.5 | 57.1         | 114.23           |
| 32     | Triethylamine            | 16.78    | +0.5 to -0.5 | 101.0        | 101.19           |
| 33     | Heptane                  | 17.36    | +0.5 to -0.5 | 71.1         | 100.23           |
| 34     | 1-Butanol                | 17.76    | +0.5 to -0.5 | 56.1         | 74.12            |
| 35     | Trichloroethylene        | 18.25    | +0.5 to -0.5 | 130.0        | 131.39           |
| 36     | Methylcyclohexane        | 19.07    | +0.5 to -0.5 | 83.0         | 98.19            |
| 37     | 1,4-Dioxane              | 19.11    | +0.5 to -0.5 | 88.0         | 88.11            |
| 38     | n-Propylacetate          | 19.36    | +0.5 to -0.5 | 61.0         | 102.13           |
| 39     | 2-Ethoxyethanol          | 19.98    | +0.5 to -0.5 | 72.1         | 90.12            |
| 40     | Pyridine                 | 21.26    | +0.5 to -0.5 | 79.1         | 79.10            |
| 41     | Methylisobutylketone     | 21.27    | +0.5 to -0.5 | 58.1         | 100.16           |
| 42     | Cyclopentyl methyl ether | 21.27    | +0.5 to -0.5 | 71.0         | 100.16           |
| 43     | 3-Methyl-1-butanol       | 21.46    | +0.5 to -0.5 | 70.1         | 88.15            |
| 44     | Toluene                  | 21.83    | +0.5 to -0.5 | 92.0         | 92.14            |
| 45     | Iso butyl acetate        | 22.18    | +0.5 to -0.5 | 56.1         | 116.16           |
| 46     | 1-Pentanol               | 22.75    | +0.5 to -0.5 | 70.1         | 88.15            |
| 47     | 2-Hexanone               | 23.40    | +0.5 to -0.5 | 58.1         | 100.16           |
| 48     | Ethylene glycol          | 23.58    | +0.5 to -0.5 | 43.0         | 62.07            |
| 49     | n-Butyl acetate          | 23.86    | +0.5 to -0.5 | 56.1         | 116.16           |
| 50     | Formamide                | 23.99    | +1.0 to -1.0 | 45.0         | 45.04            |
| 51     | Dimethylformamide        | 24.28    | +0.5 to -0.5 | 73.0         | 73.09            |
| 52     | Chlorobenzene            | 25.65    | +0.5 to -0.5 | 112.0        | 112.56           |
| 53     | p-Xylene                 | 26.52    | +0.5 to -0.5 | 106.0        | 106.17           |
| 54     | Dimethyl sulfoxide       | 27.41    | +2.5 to -2.5 | 78.0         | 78.13            |
| 55     | Dimethylacetamide        | 27.83    | +0.5 to -0.5 | 87.0         | 87.12            |
| 56     | Cumene                   | 28.17    | +0.5 to -0.5 | 120.0        | 120.19           |
| 57     | Anisole                  | 28.26    | +0.5 to -0.5 | 108.0        | 108.14           |

3  
4  
5  
6

1 Table S9: Recovery results for Verapamil Hydrochloride (API), and Calaptin 120SR tablet.

2

| Sr. No | Peak Name              | RT (min) | Verapamil-Recovery |        |        | Calaptin 120SR-Recovery |        |        |
|--------|------------------------|----------|--------------------|--------|--------|-------------------------|--------|--------|
|        |                        |          | 70%                | 110%   | 150%   | 70%                     | 110%   | 150%   |
| 1      | Methanol               | 5.26     | 112.50             | 95.36  | 101.92 | 82.78                   | 98.06  | 91.06  |
| 2      | Ethanol                | 6.67     | 107.66             | 106.42 | 107.56 | 83.21                   | 97.63  | 88.10  |
| 3      | Pentane                | 6.89     | 98.53              | 109.69 | 98.78  | 95.74                   | 94.59  | 96.54  |
| 4      | Ethyl ether            | 7.29     | 87.34              | 95.69  | 103.09 | 84.42                   | 83.99  | 92.53  |
| 5      | Acetone                | 7.67     | 96.29              | 87.12  | 102.98 | 96.47                   | 95.65  | 87.20  |
| 6      | 1,1-Dichloroethene     | 7.98     | 101.15             | 94.97  | 88.48  | 88.71                   | 103.21 | 92.03  |
| 7      | Isopropyl alcohol      | 7.98     | 95.38              | 95.26  | 81.68  | 88.78                   | 103.16 | 91.95  |
| 8      | Ethyl formate          | 8.20     | 91.50              | 89.08  | 81.39  | 93.93                   | 94.65  | 87.43  |
| 9      | Acetonitrile           | 8.24     | 95.41              | 95.87  | 96.33  | 85.31                   | 98.90  | 93.23  |
| 10     | Methyl acetate         | 8.68     | 104.93             | 86.60  | 99.56  | 98.15                   | 89.56  | 90.40  |
| 11     | Dichloromethane        | 9.03     | 93.11              | 93.91  | 96.16  | 96.00                   | 89.77  | 93.68  |
| 12     | t-Butanol              | 9.14     | 108.26             | 94.51  | 96.33  | 85.93                   | 104.24 | 85.30  |
| 13     | MTBE                   | 10.06    | 103.89             | 85.11  | 102.89 | 102.17                  | 94.13  | 87.98  |
| 14     | 1-propanol             | 11.16    | 99.66              | 97.07  | 96.78  | 84.91                   | 89.48  | 93.71  |
| 15     | Hexane                 | 11.17    | 99.06              | 97.25  | 101.14 | 100.10                  | 99.94  | 88.37  |
| 16     | isopropyl ether        | 11.72    | 96.82              | 84.50  | 98.60  | 98.52                   | 84.63  | 94.01  |
| 17     | Nitromethane           | 12.48    | 100.72             | 94.28  | 93.43  | 100.96                  | 96.80  | 89.95  |
| 18     | Methyl ethyl ketone    | 12.93    | 100.26             | 90.96  | 104.13 | 85.80                   | 93.78  | 89.31  |
| 19     | Ethyl acetate          | 13.33    | 88.78              | 90.10  | 103.75 | 83.77                   | 92.40  | 89.93  |
| 20     | 2-Butanol              | 13.57    | 108.92             | 94.77  | 91.64  | 86.00                   | 102.37 | 87.32  |
| 21     | THF                    | 14.05    | 86.91              | 85.46  | 96.30  | 91.66                   | 92.36  | 91.03  |
| 22     | Trichloro methane      | 14.15    | 98.88              | 95.24  | 108.95 | 84.68                   | 98.37  | 89.03  |
| 23     | 2,2-Dimethoxy propane  | 15.14    | 103.21             | 89.19  | 101.10 | 84.9                    | 94.14  | 89.02  |
| 24     | cyclohexane            | 15.29    | 92.09              | 96.50  | 94.10  | 94.94                   | 85.67  | 95.47  |
| 25     | 2-methoxy ethanol      | 15.48    | 95.40              | 95.21  | 88.76  | 89.58                   | 105.69 | 84.88  |
| 26     | 2-methyl-1-propanol    | 15.48    | 103.70             | 100.67 | 93.50  | 90.64                   | 104.39 | 89.10  |
| 27     | 1,2-Dimethoxy ethane   | 15.89    | 107.56             | 113.22 | 91.89  | 115.65                  | 104.27 | 90.30  |
| 28     | Benzene                | 16.01    | 96.25              | 91.79  | 98.40  | 87.77                   | 92.33  | 90.31  |
| 29     | Isopropyl acetate      | 16.23    | 96.01              | 90.69  | 94.33  | 82.99                   | 95.72  | 88.83  |
| 30     | 2-methylTHF            | 16.53    | 99.19              | 85.63  | 82.04  | 83.68                   | 95.94  | 89.03  |
| 31     | Isooctane              | 16.65    | 99.95              | 105.51 | 102.20 | 80.99                   | 92.41  | 98.40  |
| 32     | Triethylamine          | 16.79    | 95.6               | 82.99  | 109.62 | 92.77                   | 86.79  | 96.96  |
| 33     | Heptane                | 17.29    | 112.23             | 96.41  | 108.04 | 115.52                  | 88.02  | 96.02  |
| 34     | 1-Butanol              | 17.68    | 116.23             | 96.58  | 105.72 | 87.33                   | 101.69 | 87.90  |
| 35     | Trichloroethylene      | 18.18    | 99.99              | 97.41  | 99.05  | 87.05                   | 86.82  | 96.71  |
| 36     | Methylcyclohexane      | 18.99    | 100.57             | 82.26  | 119.14 | 90.28                   | 87.1   | 96.46  |
| 37     | 1,4-Dioxane            | 19.06    | 105.05             | 95.38  | 100.3  | 80.92                   | 89.24  | 92.38  |
| 38     | n-Propyl acetate       | 19.29    | 109.75             | 89.06  | 82.11  | 80.62                   | 95.69  | 89.61  |
| 39     | 2-ethoxyethanol        | 19.99    | 96.45              | 105.42 | 100.97 | 82.82                   | 97.69  | 86.49  |
| 40     | Methylisobutylketone   | 21.20    | 104.74             | 93.80  | 104.95 | 83.63                   | 99.66  | 113.95 |
| 41     | Pyridine               | 21.20    | 103.41             | 83.08  | 99.35  | 85.46                   | 98.66  | 94.07  |
| 42     | Cyclopentylmethylether | 21.37    | 99.21              | 86.98  | 115.09 | 82.01                   | 100.69 | 89.45  |
| 43     | 3-methyl-1-butanol     | 21.40    | 100.55             | 92.95  | 110.35 | 86.74                   | 100.53 | 89.10  |
| 44     | Toluene                | 21.77    | 107.60             | 92.85  | 101.71 | 81.06                   | 90.43  | 92.59  |
| 45     | Isobutyl acetate       | 22.12    | 97.85              | 90.12  | 114.10 | 82.81                   | 98.42  | 89.34  |
| 46     | 1-Pentanol             | 22.70    | 100.24             | 103.98 | 97.73  | 98.74                   | 99.06  | 100.99 |
| 47     | 2-Hexanone             | 23.36    | 108.26             | 99.27  | 102.29 | 83.05                   | 99.41  | 90.08  |
| 48     | Ethylene glycol        | 23.59    | 84.54              | 94.14  | 103.87 | 88.46                   | 99.79  | 87.19  |
| 49     | n-butyl acetate        | 23.81    | 100.45             | 90.94  | 111.74 | 83.67                   | 98.25  | 89.24  |
| 50     | n-DMF                  | 24.28    | 107.48             | 99.49  | 90.31  | 85.54                   | 96.47  | 89.84  |
| 51     | Formamide              | 24.47    | 104.93             | 103.30 | 86.02  | 88.59                   | 95.07  | 87.41  |
| 52     | chlorobenzene          | 25.58    | 91.51              | 98.24  | 94.99  | 80.87                   | 85.03  | 95.75  |
| 53     | p-Xylene               | 26.44    | 101.63             | 97.33  | 98.89  | 80.69                   | 87.79  | 93.49  |
| 54     | DMSO                   | 27.41    | 95.25              | 100.46 | 94.61  | 84.43                   | 92.97  | 93.29  |
| 55     | DMA                    | 27.81    | 98.22              | 100.37 | 95.78  | 84.94                   | 91.22  | 93.73  |
| 56     | cumene                 | 28.11    | 97.17              | 98.64  | 102.77 | 82.17                   | 86.86  | 95.55  |
| 57     | Anisole                | 28.19    | 97.12              | 97.48  | 90.11  | 83.40                   | 87.43  | 93.25  |

3  
4

1 Table S10: Recovery results for Amitriptyline Hydrochloride (API) and Amitone 25 tablet.  
2

| Sr. No | Peak Name              | RT (min) | Amitriptyline-Recovery |        |        | Amitone 25-Recovery |        |        |
|--------|------------------------|----------|------------------------|--------|--------|---------------------|--------|--------|
|        |                        |          | 70%                    | 110%   | 150%   | 70%                 | 110%   | 150%   |
| 1      | Methanol               | 5.26     | 112.41                 | 90.71  | 100.69 | 82.78               | 85.69  | 111.17 |
| 2      | Ethanol                | 6.67     | 115.77                 | 89.80  | 116.67 | 83.21               | 83.98  | 103.94 |
| 3      | Pentane                | 6.89     | 97.38                  | 100.16 | 94.23  | 95.74               | 89.83  | 87.63  |
| 4      | Ethyl ether            | 7.29     | 87.30                  | 95.29  | 103.98 | 84.42               | 98.16  | 109.18 |
| 5      | Acetone                | 7.67     | 103.94                 | 102.79 | 103.42 | 96.47               | 82.43  | 85.87  |
| 6      | 1,1-Dichloroethene     | 7.98     | 109.05                 | 87.67  | 92.58  | 88.71               | 86.61  | 98.09  |
| 7      | Isopropyl alcohol      | 7.98     | 109.07                 | 87.94  | 92.82  | 88.78               | 86.79  | 99.49  |
| 8      | Ethyl formate          | 8.20     | 107.98                 | 84.63  | 92.65  | 93.93               | 82.34  | 92.01  |
| 9      | Acetonitrile           | 8.24     | 112.80                 | 86.94  | 107.42 | 85.31               | 81.55  | 93.76  |
| 10     | Methyl acetate         | 8.68     | 103.57                 | 83.31  | 99.64  | 98.15               | 92.89  | 96.68  |
| 11     | Dichloromethane        | 9.03     | 108.41                 | 89.23  | 92.58  | 96.00               | 81.23  | 101.67 |
| 12     | t-Butanol              | 9.14     | 107.38                 | 86.48  | 88.93  | 85.93               | 85.76  | 97.87  |
| 13     | MTBE                   | 10.06    | 97.69                  | 85.43  | 117.50 | 102.17              | 86.41  | 110.36 |
| 14     | 1-propanol             | 11.16    | 105.24                 | 84.68  | 102.25 | 84.91               | 82.91  | 97.57  |
| 15     | Hexane                 | 11.17    | 109.48                 | 89.69  | 89.39  | 100.10              | 85.44  | 101.10 |
| 16     | Isopropyl ether        | 11.72    | 100.38                 | 83.84  | 83.08  | 98.52               | 84.65  | 97.30  |
| 17     | Nitromethane           | 12.48    | 109.95                 | 89.03  | 85.09  | 100.96              | 87.41  | 111.45 |
| 18     | Methyl ethyl ketone    | 12.93    | 107.30                 | 85.80  | 100.15 | 85.80               | 87.37  | 97.95  |
| 19     | Ethyl acetate          | 13.33    | 107.46                 | 85.49  | 114.14 | 83.77               | 82.70  | 96.29  |
| 20     | 2-Butanol              | 13.57    | 107.48                 | 86.51  | 89.70  | 86.00               | 85.67  | 87.99  |
| 21     | THF                    | 14.05    | 102.94                 | 82.26  | 103.61 | 91.66               | 86.48  | 93.59  |
| 22     | Trichloro methane      | 14.15    | 109.17                 | 88.38  | 89.88  | 84.68               | 84.39  | 99.16  |
| 23     | 2,2-Dimethoxy propane  | 15.14    | 105.78                 | 85.20  | 82.07  | 84.90               | 81.63  | 100.15 |
| 24     | cyclohexane            | 15.29    | 95.49                  | 105.71 | 105.74 | 94.94               | 84.27  | 108.42 |
| 25     | 2-methoxy ethanol      | 15.48    | 106.57                 | 85.28  | 86.02  | 89.58               | 85.62  | 107.87 |
| 26     | 2-methyl-1-propanol    | 15.48    | 111.48                 | 91.94  | 99.64  | 90.64               | 85.62  | 107.63 |
| 27     | 1,2-Dimethoxy ethane   | 15.89    | 104.02                 | 102.33 | 91.20  | 115.65              | 103.45 | 100.93 |
| 28     | Benzene                | 16.01    | 109.66                 | 87.31  | 87.13  | 87.77               | 82.23  | 95.27  |
| 29     | Isopropyl acetate      | 16.23    | 105.91                 | 84.05  | 101.48 | 82.99               | 82.80  | 93.39  |
| 30     | 2-methylTHF            | 16.53    | 102.06                 | 80.94  | 103.24 | 83.68               | 81.76  | 100.09 |
| 31     | Isooctane              | 16.65    | 95.04                  | 91.08  | 113.22 | 80.99               | 88.87  | 100.53 |
| 32     | Triethylamine          | 16.79    | 101.51                 | 80.74  | 106.15 | 92.77               | 87.50  | 108.79 |
| 33     | Heptane                | 17.29    | 87.27                  | 110.75 | 113.13 | 115.52              | 83.79  | 102.37 |
| 34     | 1-Butanol              | 17.68    | 110.02                 | 87.13  | 114.73 | 87.33               | 85.86  | 90.78  |
| 35     | Trichloroethylene      | 18.18    | 111.44                 | 92.65  | 82.11  | 87.05               | 81.48  | 81.69  |
| 36     | Methylcyclohexane      | 18.99    | 99.05                  | 82.09  | 81.87  | 90.28               | 112.29 | 104.06 |
| 37     | 1,4-Dioxane            | 19.06    | 109.55                 | 90.33  | 96.97  | 80.92               | 82.43  | 94.53  |
| 38     | n-Propyl acetate       | 19.29    | 104.04                 | 81.95  | 116.88 | 80.62               | 81.22  | 87.49  |
| 39     | 2-ethoxyethanol        | 19.99    | 115.26                 | 97.02  | 103.49 | 82.82               | 83.33  | 94.35  |
| 40     | Methylisobutylketone   | 21.20    | 105.14                 | 82.99  | 102.48 | 83.63               | 82.40  | 101.05 |
| 41     | Pyridine               | 21.20    | 104.47                 | 114.85 | 97.15  | 85.46               | 96.45  | 101.33 |
| 42     | Cyclopentylmethylether | 21.37    | 101.90                 | 107.44 | 115.32 | 82.01               | 83.57  | 83.35  |
| 43     | 3-methyl1-butanol      | 21.40    | 104.76                 | 83.21  | 105.70 | 86.74               | 84.77  | 99.81  |
| 44     | Toluene                | 21.77    | 107.41                 | 86.81  | 100.09 | 81.06               | 82.43  | 99.29  |
| 45     | Isobutyl acetate       | 22.12    | 102.91                 | 81.60  | 111.40 | 82.81               | 82.93  | 88.19  |
| 46     | 1-Pentanol             | 22.70    | 119.39                 | 92.77  | 97.28  | 98.74               | 94.52  | 110.89 |
| 47     | 2-Hexanone             | 23.36    | 110.53                 | 94.38  | 88.47  | 83.05               | 91.21  | 102.76 |
| 48     | Ethylene glycol        | 23.59    | 92.84                  | 98.09  | 113.69 | 88.46               | 95.37  | 106.20 |
| 49     | n-butyl acetate        | 23.81    | 104.03                 | 81.63  | 114.44 | 83.67               | 83.16  | 88.49  |
| 50     | n-DMF                  | 24.28    | 114.32                 | 90.75  | 82.45  | 85.54               | 84.55  | 104.17 |
| 51     | Formamide              | 24.47    | 105.45                 | 111.53 | 116.61 | 88.59               | 86.89  | 105.88 |
| 52     | chlorobenzene          | 25.58    | 110.67                 | 92.49  | 84.50  | 80.87               | 89.74  | 85.63  |
| 53     | p-Xylene               | 26.44    | 110.98                 | 91.24  | 98.13  | 80.69               | 94.63  | 80.77  |
| 54     | DMSO                   | 27.41    | 112.99                 | 92.49  | 111.66 | 84.43               | 83.76  | 80.18  |
| 55     | DMA                    | 27.81    | 114.42                 | 93.12  | 111.56 | 84.94               | 83.87  | 80.51  |
| 56     | cumene                 | 28.11    | 110.83                 | 92.16  | 82.51  | 82.17               | 81.81  | 83.94  |
| 57     | Anisole                | 28.19    | 110.89                 | 90.45  | 103.42 | 83.40               | 95.24  | 81.83  |

3  
4  
5

1 Table S11: Robustness was evaluated for split ratio and oven temperature variations using a Fenoterol Hydrobromide solution  
 2 spiked with the 57-solvent mixture (100% level) and analyzed by MS-SIM.  
 3

| Sr. No | Peak Name                | RT (min) | Split Ratio, % Recovery |               |               | Oven Temperature, % Recovery |             |             |
|--------|--------------------------|----------|-------------------------|---------------|---------------|------------------------------|-------------|-------------|
|        |                          |          | 35:1 (Standard)         | 33.5:1 (- 5%) | 36.5:1 (+ 5%) | 40°C (Standard)              | 38°C (- 5%) | 42°C (+ 5%) |
| 1      | Methanol                 | 5.25     | 106.06                  | 97.53         | 99.86         | 106.06                       | 101.43      | 102.09      |
| 2      | Ethanol                  | 6.68     | 104.20                  | 96.19         | 100.18        | 104.20                       | 100.51      | 101.46      |
| 3      | Pentane                  | 6.91     | 102.09                  | 95.51         | 101.61        | 102.09                       | 95.76       | 98.58       |
| 4      | Ethyl ether              | 7.31     | 104.57                  | 95.08         | 100.94        | 104.57                       | 98.84       | 100.72      |
| 5      | Acetone                  | 7.71     | 103.52                  | 95.02         | 101.18        | 103.52                       | 99.82       | 100.65      |
| 6      | 1,1-Dichloroethene       | 7.71     | 107.52                  | 98.79         | 98.52         | 107.52                       | 101.90      | 103.75      |
| 7      | Isopropyl alcohol        | 8.02     | 102.41                  | 95.32         | 100.94        | 102.41                       | 98.97       | 100.69      |
| 8      | Ethyl formate            | 8.24     | 102.89                  | 95.49         | 101.10        | 102.89                       | 98.86       | 100.74      |
| 9      | Acetonitrile             | 8.25     | 101.75                  | 93.89         | 102.72        | 101.75                       | 99.58       | 95.32       |
| 10     | Methyl acetate           | 8.71     | 104.07                  | 92.90         | 100.03        | 104.07                       | 100.21      | 100.93      |
| 11     | Dichloromethane          | 9.08     | 105.53                  | 95.62         | 98.50         | 105.53                       | 102.41      | 102.94      |
| 12     | t-Butanol                | 9.18     | 101.38                  | 91.18         | 101.11        | 101.38                       | 98.83       | 100.65      |
| 13     | Methyl tert-butyl ether  | 10.11    | 102.63                  | 93.94         | 100.54        | 102.63                       | 99.50       | 101.55      |
| 14     | Hexane                   | 11.23    | 101.22                  | 94.06         | 101.43        | 101.22                       | 98.41       | 101.49      |
| 15     | 1-Propanol               | 11.23    | 101.78                  | 94.61         | 100.79        | 101.78                       | 99.63       | 99.94       |
| 16     | Iso propyl ether         | 11.78    | 105.93                  | 97.48         | 99.48         | 105.93                       | 101.39      | 103.42      |
| 17     | Nitromethane             | 12.45    | 105.45                  | 98.57         | 96.75         | 105.45                       | 105.21      | 96.81       |
| 18     | Methyl ethyl ketone      | 13.01    | 103.33                  | 96.90         | 100.23        | 103.33                       | 100.23      | 101.49      |
| 19     | Ethyl acetate            | 13.39    | 103.76                  | 95.53         | 99.81         | 103.76                       | 100.36      | 101.98      |
| 20     | 2-Butanol                | 13.65    | 106.48                  | 84.30         | 96.36         | 106.48                       | 95.30       | 100.65      |
| 21     | Tetrahydrofuran          | 14.12    | 104.02                  | 93.82         | 100.07        | 104.02                       | 100.52      | 101.55      |
| 22     | Trichloromethane         | 14.24    | 103.90                  | 95.27         | 99.69         | 103.90                       | 100.79      | 100.86      |
| 23     | 2,2-Dimethoxy propane    | 15.2     | 103.63                  | 97.78         | 89.09         | 103.63                       | 102.48      | 97.24       |
| 24     | Cyclohexane              | 15.37    | 107.93                  | 101.36        | 94.43         | 107.93                       | 99.40       | 99.51       |
| 25     | 2-Methyl-1-propanol      | 15.37    | 104.66                  | 96.93         | 99.68         | 104.66                       | 100.03      | 100.10      |
| 26     | 2-Methoxy ethanol        | 15.58    | 107.16                  | 87.82         | 98.43         | 107.16                       | 99.00       | 101.07      |
| 27     | 1,2-Dimethoxy ethane     | 16.09    | 105.07                  | 92.02         | 100.60        | 105.07                       | 96.70       | 94.46       |
| 28     | Benzene                  | 16.09    | 105.42                  | 96.25         | 99.49         | 105.42                       | 101.96      | 90.69       |
| 29     | Isopropyl acetate        | 16.31    | 105.99                  | 95.00         | 100.38        | 105.99                       | 100.55      | 109.36      |
| 30     | 2-Methyl tetrahydrofuran | 16.59    | 105.24                  | 94.14         | 100.35        | 105.24                       | 100.07      | 100.20      |
| 31     | Iso octane               | 16.73    | 103.20                  | 95.25         | 100.38        | 103.20                       | 98.44       | 99.65       |
| 32     | Triethylamine            | 16.78    | 104.56                  | 99.14         | 99.50         | 104.56                       | 100.35      | 102.55      |
| 33     | Heptane                  | 17.36    | 104.08                  | 99.58         | 100.81        | 104.08                       | 99.05       | 99.92       |
| 34     | 1-Butanol                | 17.76    | 95.30                   | 99.39         | 100.49        | 95.30                        | 99.61       | 85.06       |
| 35     | Trichloroethylene        | 18.25    | 105.33                  | 102.57        | 98.58         | 105.33                       | 102.10      | 96.90       |
| 36     | Methylcyclohexane        | 19.07    | 107.02                  | 100.25        | 100.54        | 107.02                       | 100.13      | 103.11      |
| 37     | 1,4-Dioxane              | 19.11    | 105.17                  | 100.44        | 99.22         | 105.17                       | 101.64      | 98.00       |
| 38     | n-Propyl acetate         | 19.36    | 105.97                  | 99.54         | 100.94        | 105.97                       | 100.31      | 84.20       |
| 39     | 2-Ethoxyethanol          | 19.98    | 106.49                  | 101.68        | 98.13         | 106.49                       | 101.35      | 102.18      |
| 40     | Pyridine                 | 21.26    | 104.71                  | 98.05         | 98.51         | 104.71                       | 100.50      | 100.95      |
| 41     | Methylisobutylketone     | 21.27    | 90.27                   | 96.57         | 101.88        | 90.27                        | 95.33       | 100.36      |
| 42     | Cyclopentyl methyl ether | 21.27    | 103.83                  | 95.31         | 97.39         | 103.83                       | 97.96       | 97.86       |
| 43     | 3-Methyl-1-butanol       | 21.46    | 103.80                  | 98.84         | 100.22        | 103.80                       | 100.11      | 95.80       |
| 44     | Toluene                  | 21.83    | 112.55                  | 97.36         | 94.57         | 112.55                       | 101.07      | 94.14       |
| 45     | Iso butyl acetate        | 22.18    | 102.06                  | 99.74         | 101.23        | 102.06                       | 102.88      | 100.92      |
| 46     | 1-Pentanol               | 22.75    | 93.04                   | 96.77         | 87.22         | 93.04                        | 99.41       | 94.09       |
| 47     | 2-Hexanone               | 23.4     | 97.62                   | 99.78         | 101.12        | 97.62                        | 99.17       | 100.96      |
| 48     | Ethylene glycol          | 23.58    | 108.27                  | 97.23         | 101.97        | 108.27                       | 103.71      | 100.54      |
| 49     | n-Butyl acetate          | 23.86    | 97.01                   | 99.67         | 101.85        | 97.01                        | 99.88       | 103.88      |
| 50     | Formamide                | 23.99    | 106.80                  | 98.78         | 106.35        | 106.80                       | 98.72       | 95.80       |
| 51     | Dimethylformamide        | 24.28    | 92.75                   | 89.79         | 103.79        | 92.75                        | 99.48       | 97.97       |
| 52     | Chlorobenzene            | 25.65    | 109.65                  | 101.35        | 98.79         | 109.65                       | 102.03      | 101.37      |
| 53     | p-Xylene                 | 26.52    | 106.10                  | 101.46        | 98.74         | 106.10                       | 101.90      | 101.30      |
| 54     | Dimethyl sulfoxide       | 27.41    | 104.52                  | 101.20        | 99.94         | 104.52                       | 101.74      | 102.99      |
| 55     | Dimethylacetamide        | 27.83    | 104.44                  | 98.78         | 99.64         | 104.44                       | 110.93      | 100.14      |
| 56     | Cumene                   | 28.17    | 99.00                   | 100.50        | 100.19        | 99.00                        | 108.72      | 103.10      |
| 57     | Anisole                  | 28.26    | 104.45                  | 101.92        | 97.93         | 104.45                       | 106.99      | 104.72      |

4  
5

**Table S12: Robustness was evaluated for flow-rate variations using a Fenoterol Hydrobromide solution spiked with the 57-solvent mixture (100% level) and analyzed by MS-SIM.**

| Sr. No | Peak Name                | RT (min) | Carrier Gas flow rate (mL/min), % Recovery |                    |                    |
|--------|--------------------------|----------|--------------------------------------------|--------------------|--------------------|
|        |                          |          | 5 mL/min (Standard)                        | 4.75 mL/min (- 5%) | 5.25 mL/min (+ 5%) |
| 1      | Methanol                 | 5.25     | 106.06                                     | 100.99             | 94.09              |
| 2      | Ethanol                  | 6.68     | 104.20                                     | 100.71             | 98.36              |
| 3      | Pentane                  | 6.91     | 102.09                                     | 96.66              | 97.64              |
| 4      | Ethyl ether              | 7.31     | 104.57                                     | 99.03              | 100.52             |
| 5      | Acetone                  | 7.71     | 103.52                                     | 99.77              | 102.10             |
| 6      | 1,1-Dichloroethene       | 7.71     | 107.52                                     | 102.18             | 98.85              |
| 7      | Isopropyl alcohol        | 8.02     | 102.41                                     | 99.73              | 101.99             |
| 8      | Ethyl formate            | 8.24     | 102.89                                     | 99.67              | 99.35              |
| 9      | Acetonitrile             | 8.25     | 101.75                                     | 100.40             | 96.04              |
| 10     | Methyl acetate           | 8.71     | 104.07                                     | 100.70             | 99.92              |
| 11     | Dichloromethane          | 9.08     | 105.53                                     | 102.01             | 101.81             |
| 12     | t-Butanol                | 9.18     | 101.38                                     | 100.29             | 100.67             |
| 13     | Methyl tert-butyl ether  | 10.11    | 102.63                                     | 99.88              | 101.26             |
| 14     | Hexane                   | 11.23    | 101.22                                     | 99.65              | 100.90             |
| 15     | 1-Propanol               | 11.23    | 101.78                                     | 102.11             | 99.13              |
| 16     | Iso propyl ether         | 11.78    | 105.93                                     | 102.03             | 99.32              |
| 17     | Nitromethane             | 12.45    | 105.45                                     | 96.27              | 105.20             |
| 18     | Methyl ethyl ketone      | 13.01    | 103.33                                     | 101.60             | 99.24              |
| 19     | Ethyl acetate            | 13.39    | 103.76                                     | 101.81             | 101.22             |
| 20     | 2-Butanol                | 13.65    | 106.48                                     | 101.62             | 97.31              |
| 21     | Tetrahydrofuran          | 14.12    | 104.02                                     | 101.54             | 98.36              |
| 22     | Trichloromethane         | 14.24    | 103.90                                     | 102.92             | 98.36              |
| 23     | 2,2-Dimethoxy propane    | 15.20    | 103.63                                     | 103.06             | 100.44             |
| 24     | Cyclohexane              | 15.37    | 107.93                                     | 100.70             | 100.56             |
| 25     | 2-Methyl 1-propanol      | 15.37    | 104.66                                     | 100.97             | 99.40              |
| 26     | 2-Methoxy ethanol        | 15.58    | 107.16                                     | 102.17             | 101.06             |
| 27     | 1,2-Dimethoxy ethane     | 16.09    | 105.07                                     | 106.71             | 108.66             |
| 28     | Benzene                  | 16.09    | 105.42                                     | 102.23             | 104.67             |
| 29     | Isopropyl acetate        | 16.31    | 105.99                                     | 101.58             | 99.79              |
| 30     | 2-Methyl tetrahydrofuran | 16.59    | 105.24                                     | 101.78             | 101.01             |
| 31     | Iso octane               | 16.73    | 103.20                                     | 100.50             | 99.72              |
| 32     | Triethylamine            | 16.78    | 104.56                                     | 101.98             | 106.81             |
| 33     | Heptane                  | 17.36    | 104.08                                     | 100.02             | 100.32             |
| 34     | 1-Butanol                | 17.76    | 95.30                                      | 101.78             | 101.45             |
| 35     | Trichloroethylene        | 18.25    | 105.33                                     | 102.77             | 100.62             |
| 36     | Methylcyclohexane        | 19.07    | 107.02                                     | 100.97             | 100.93             |
| 37     | 1,4-Dioxane              | 19.11    | 105.17                                     | 102.87             | 92.32              |
| 38     | n-Propylacetate          | 19.36    | 105.97                                     | 101.57             | 98.91              |
| 39     | 2-Ethoxyethanol          | 19.98    | 106.49                                     | 105.78             | 112.88             |
| 40     | Pyridine                 | 21.26    | 104.71                                     | 100.34             | 89.55              |
| 41     | Methylisobutylketone     | 21.27    | 90.27                                      | 100.75             | 101.64             |
| 42     | Cyclopentyl methyl ether | 21.27    | 103.83                                     | 111.20             | 94.15              |
| 43     | 3-Methyl 1-butanol       | 21.46    | 103.80                                     | 94.16              | 100.33             |
| 44     | Toluene                  | 21.83    | 112.55                                     | 102.01             | 99.76              |
| 45     | Iso butyl acetate        | 22.18    | 102.06                                     | 100.12             | 98.74              |
| 46     | 1-Pentanol               | 22.75    | 93.04                                      | 100.65             | 99.90              |
| 47     | 2-Hexanone               | 23.40    | 97.62                                      | 100.39             | 96.51              |
| 48     | Ethylene glycol          | 23.58    | 108.27                                     | 101.92             | 99.24              |
| 49     | n-Butyl acetate          | 23.86    | 97.01                                      | 100.40             | 100.93             |
| 50     | Formamide                | 23.99    | 106.80                                     | 104.38             | 98.00              |
| 51     | Dimethylformamide        | 24.28    | 92.75                                      | 101.95             | 103.07             |
| 52     | Chlorobenzene            | 25.65    | 109.65                                     | 102.89             | 101.30             |
| 53     | p-Xylene                 | 26.52    | 106.10                                     | 102.69             | 99.54              |
| 54     | Dimethyl sulfoxide       | 27.41    | 104.52                                     | 102.28             | 101.15             |
| 55     | Dimethylacetamide        | 27.83    | 104.44                                     | 102.75             | 102.50             |
| 56     | Cumene                   | 28.17    | 99.00                                      | 103.18             | 100.36             |
| 57     | Anisole                  | 28.26    | 104.45                                     | 102.23             | 99.50              |

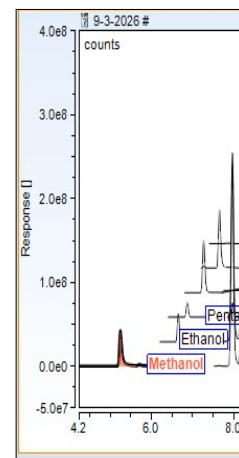

Figure S16: Robustness was evaluated at a split ratio of 33.5 using the optimized method; a standard solution of 57-solvent mixture (100% level) without Fenoterol Hydrobromide was analyzed by MS-SIM.

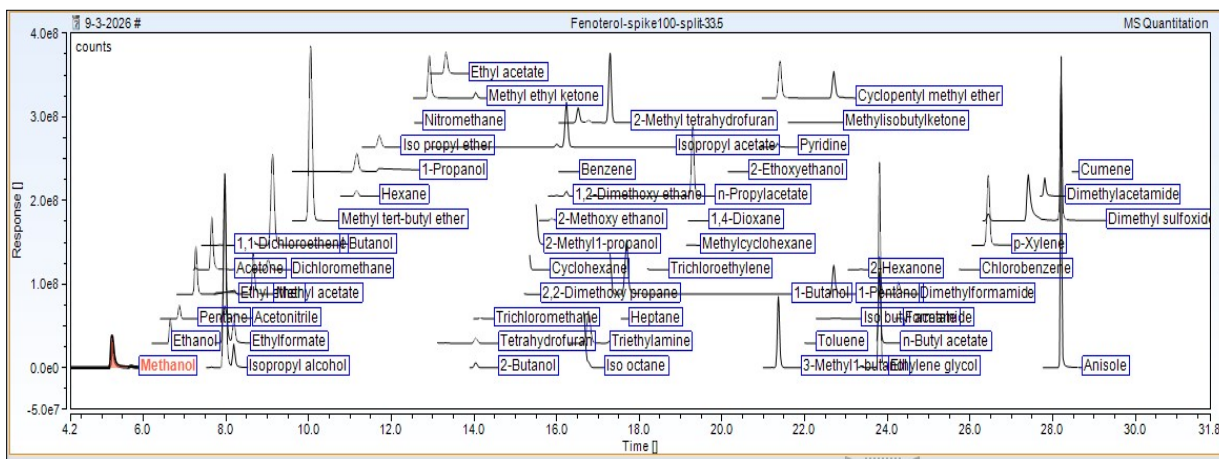

1

2 Figure S17: Robustness was evaluated at a split ratio of 33.5 using the optimized method; a Fenoterol Hydrobromide solution spiked  
3 with the 57-solvent mix (100% level) was analyzed by MS-SIM.

4

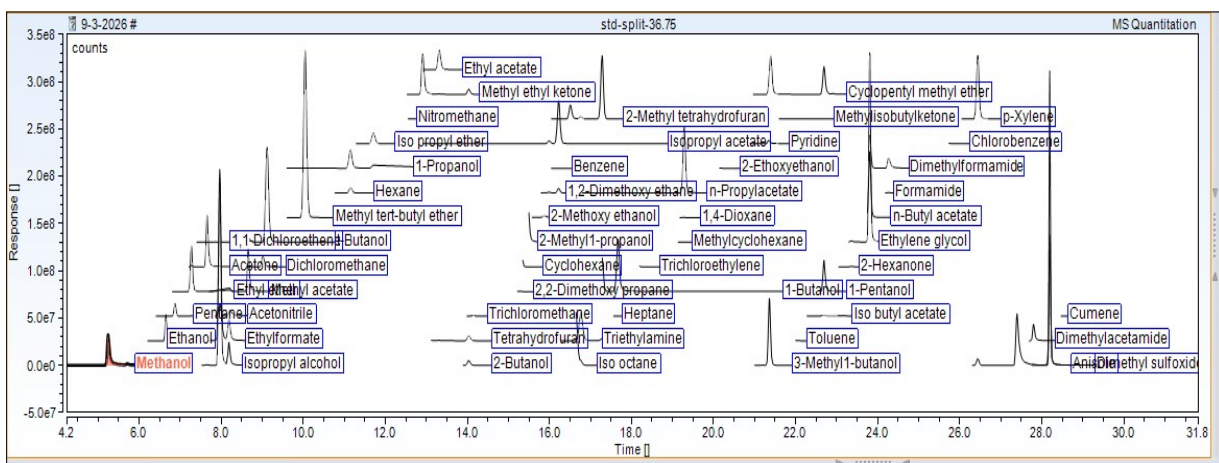

5

6 Figure S18: Robustness was evaluated at a split ratio of 36.75 using the optimized method; a standard solution of 57-solvent mix (100%  
7 level) without Fenoterol Hydrobromide was analyzed by MS-SIM.

8

9

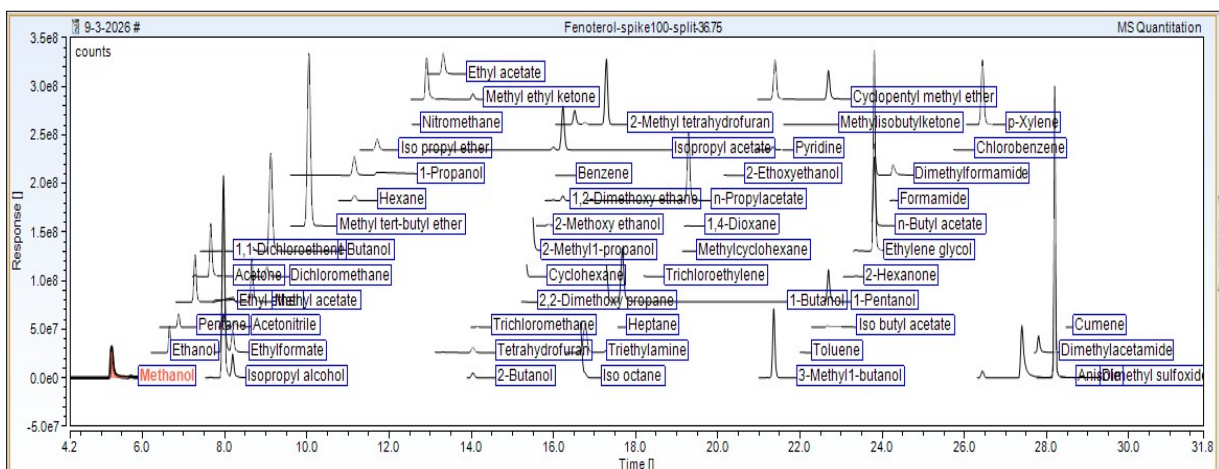

10

11 Figure S19: Robustness was evaluated at a split ratio of 36.75 using the optimized method; a Fenoterol Hydrobromide solution spiked  
12 with the 57-solvent mix (100% level) was analyzed by MS-SIM.

13

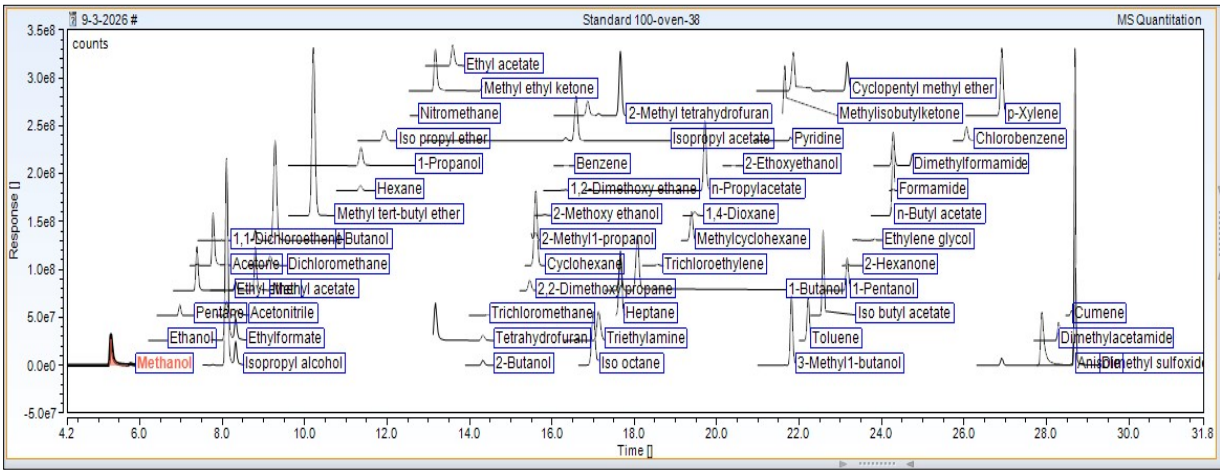

1  
 2 Figure S20: Robustness was evaluated at an oven temperature 38°C using the optimized method; a standard solution of 57-solvent mix  
 3 (100% level) without Fenoterol Hydrobromide was analyzed by MS-SIM.

4

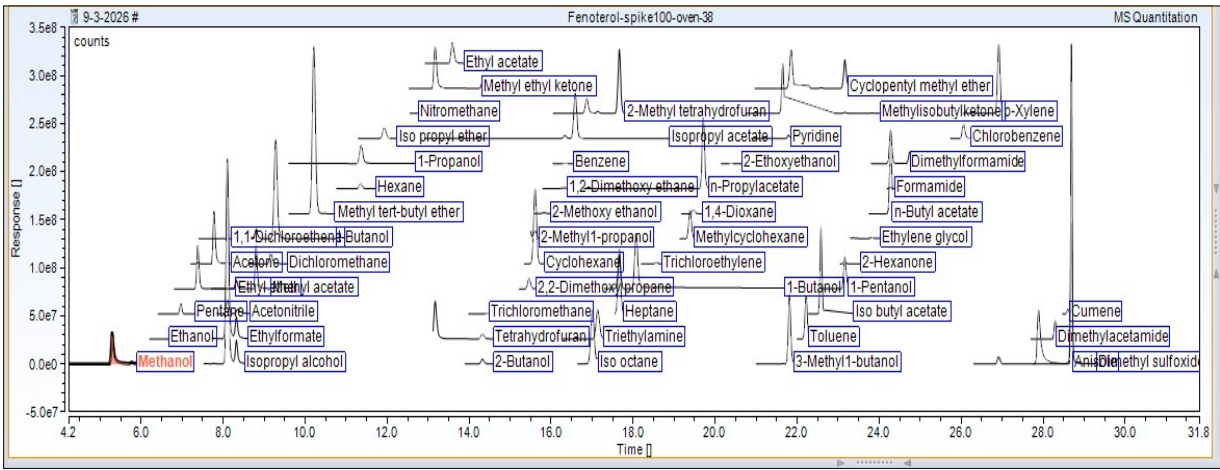

5  
 6 Figure S21: Robustness was evaluated at an oven temperature 38°C using the optimized method; a Fenoterol Hydrobromide solution  
 7 spiked with the 57-solvent mix (100% level) was analyzed by MS-SIM.

8

9

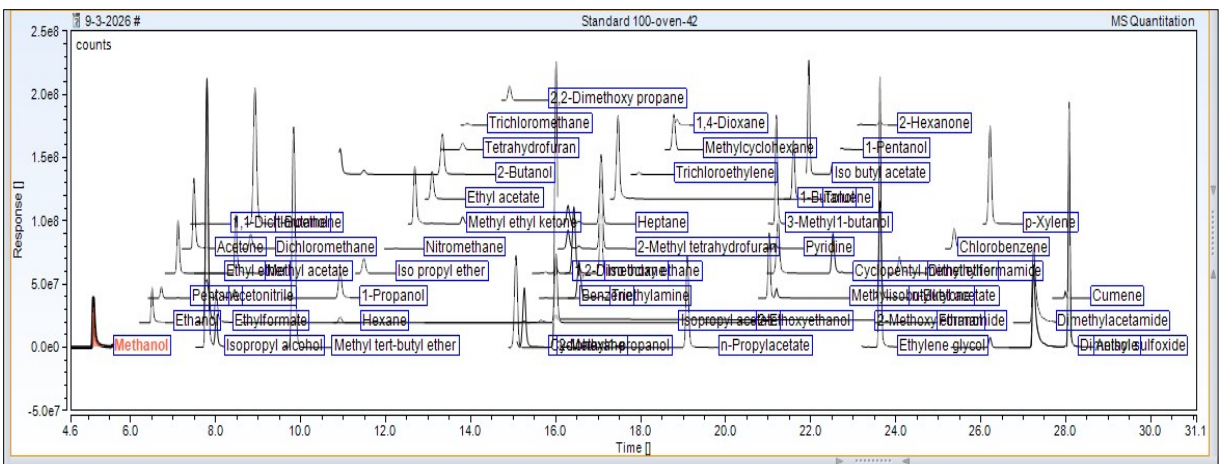

10  
 11 Figure S22: Robustness was evaluated at an oven temperature 42°C using the optimized method; a standard solution of 57-solvent mix  
 12 (100% level) without Fenoterol Hydrobromide was analyzed by MS-SIM.

13

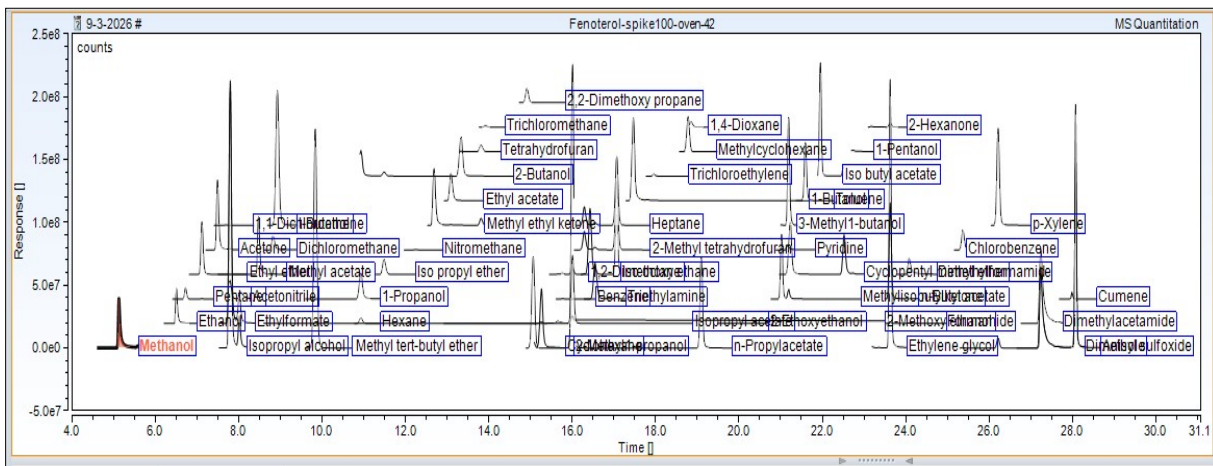

1

2 Figure S23: Robustness was evaluated at an oven temperature 42°C using the optimized method; a Fenoterol Hydrobromide solution  
 3 spiked with the 57-solvent mix (100% level) was analyzed by MS-SIM.

4

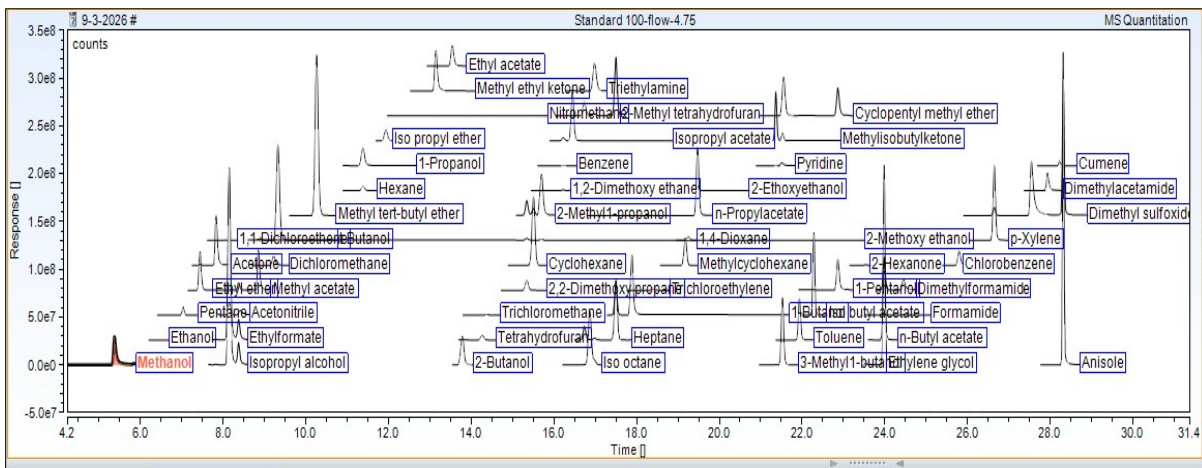

5

6 Figure S24: Robustness was evaluated at a flow rate 4.75 ml/min using the optimized method; a standard solution of 57-solvent mix  
 7 (100% level) without Fenoterol Hydrobromide was analyzed by MS-SIM.

8

9

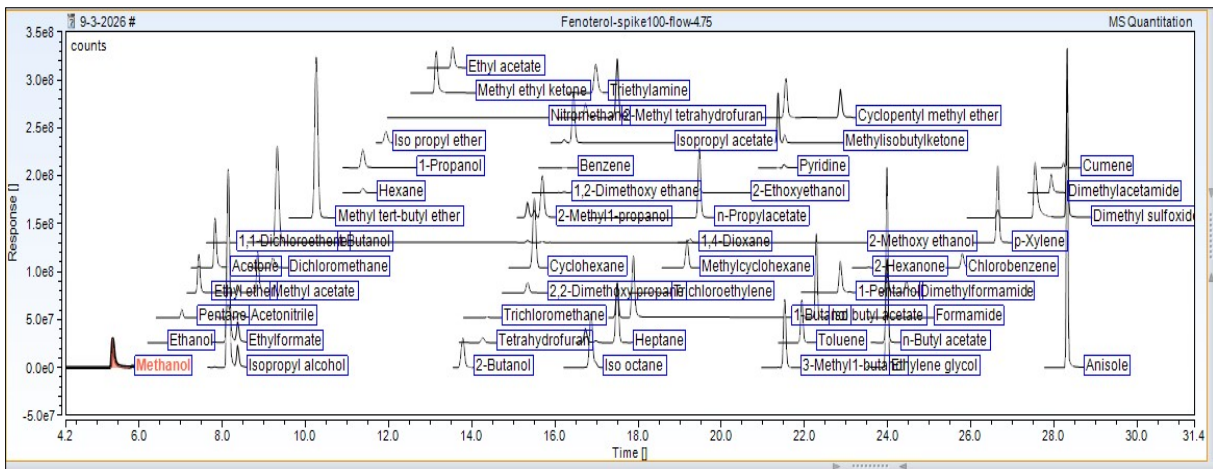

10

11 Figure S25: Robustness was evaluated at a flow rate 4.75 ml/min using the optimized method; a Fenoterol Hydrobromide solution spiked  
 12 with the 57-solvent mix (100% level) was analyzed by MS-SIM.

13

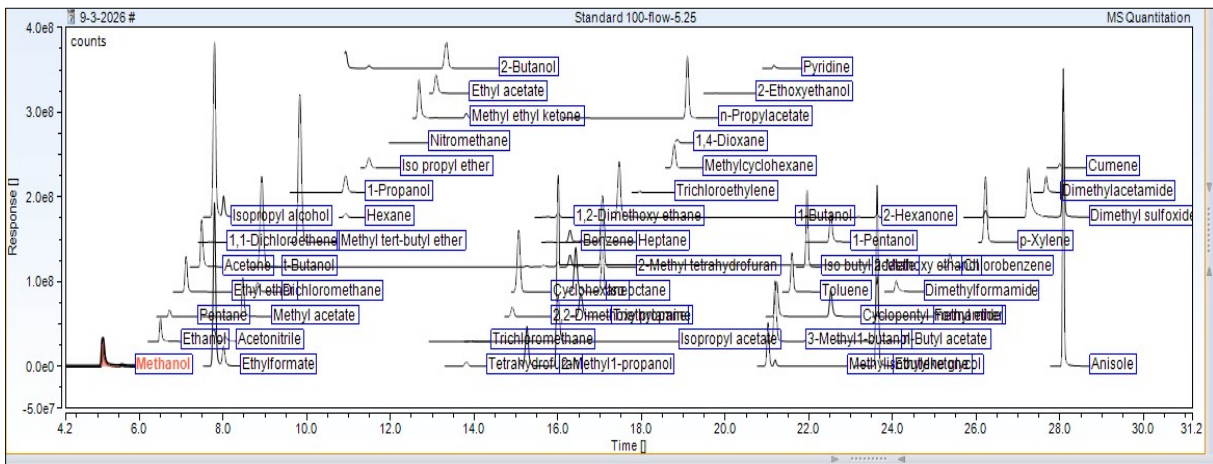

1

2 Figure S26: Robustness was evaluated at a flow rate 5.25 ml/min using the optimized method; a standard solution of 57-solvent mix  
 3 (100% level) without Fenoterol Hydrobromide was analyzed by MS-SIM.

4

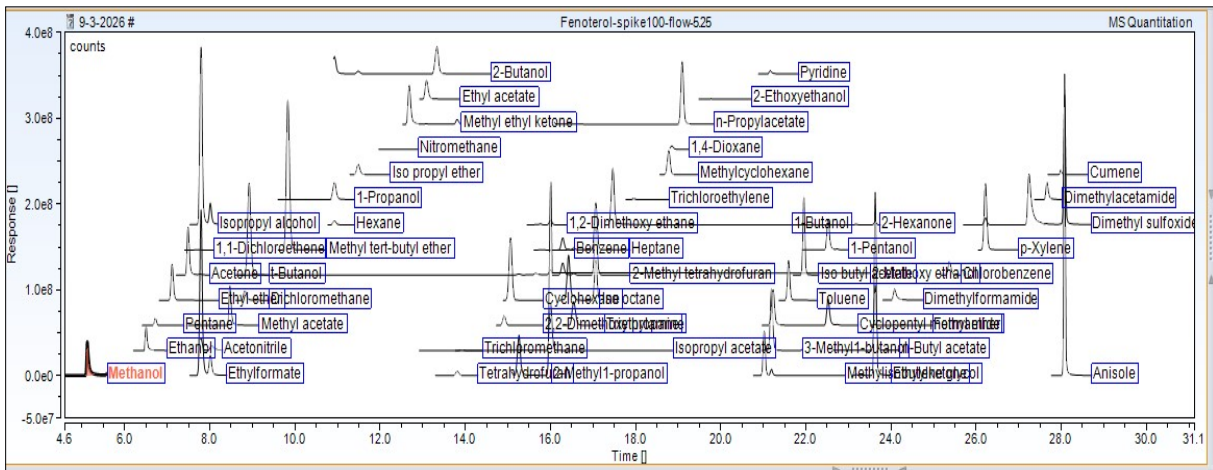

5

6 Figure S27: Robustness was evaluated at a flow rate 5.25 ml/min using the optimized method; a Fenoterol Hydrobromide solution spiked  
 7 with the 57-solvent mix (100% level) was analyzed by MS-SIM.
